# Supplementary material for: Inherently chiral belt-shaped conjugated macrocycles with strong fluorescence and circularly polarized luminescence
Source: Royal Society of Chemistry journal article supplement (doi:10.1039/d2cc05504j), 2022-11-28
Supplement: d2cc05504j1.pdf [file d2cc05504j1.pdf]

## Electronic Supplementary Information

### **Inherently chiral belt-shaped conjugated macrocycles with strong fluorescence and circularly polarized luminescence**

Xu-Sheng Du,<sup>a,b</sup> Xiao-Ni Han,<sup>a</sup> Ying Han<sup>\*,a</sup> and Chuan-Feng Chen<sup>\*a,b</sup>

<sup>a</sup> *Beijing National Laboratory for Molecular Sciences, CAS Key Laboratory of  
Molecular Recognition and Function, Institute of Chemistry, Chinese Academy of  
Sciences, Beijing 100190, China.*

<sup>b</sup> *University of Chinese Academy of Sciences, Beijing 100049, China.*

*Email: cchen@iccas.ac.cn; hanying463@iccas.ac.cn*

## Contents

|                                                                 |    |
|-----------------------------------------------------------------|----|
| 1. General information.....                                     | 3  |
| 2. Synthesis and characterizations .....                        | 3  |
| 3. NMR and mass spectra of new compounds .....                  | 6  |
| 4. HPLC resolution .....                                        | 17 |
| 5. The X-ray crystal structures and crystallographic data ..... | 17 |
| 6. Photophysical properties .....                               | 22 |
| 7. Circular dichroism.....                                      | 24 |
| 8. Circularly polarized luminescence .....                      | 24 |
| 9. Theoretical calculations .....                               | 25 |
| 9.1 Calculated UV-vis spectra.....                              | 25 |
| 9.2 Calculated ECD spectra of <b>4</b> .....                    | 27 |
| 9.3 TD-DFT vertical one-electron excitations .....              | 28 |
| 10. Cartesian coordinates of the optimized structures .....     | 34 |
| 11. References.....                                             | 39 |

## 1. General information

The commercially available reagents were used without further purification. Solvents were employed as purchased or dried with Molecular Sieves.  $^1\text{H}$  NMR spectra and  $^{13}\text{C}$  NMR spectra were recorded on a Bruker 700 MHz spectrometer (or a Bruker 500 MHz spectrometer). High-resolution mass spectrum (HRMS) was obtained on an auto-flex TOF/TOF mass spectrometer. Single crystal data was collected on a Bruker Smart APEXII CCD diffractometer using graphite monochromated Cu K $\alpha$  radiation. The UV-vis spectra were recorded on PerkinElmer<sup>®</sup> UV/Vis/NIR spectrometer (Lambda 950). Circular dichroism spectroscopy was recorded on a J-1700 spectrometer. Circularly polarized luminescence was recorded on a JASCO-300 spectrometer. Preparative silica gel plates separation and normal TLC analysis were performed on pre-coated, glass-backed silica gel plates. The energy-minimized structures were optimized using the Gaussian 16 program,<sup>S1</sup> based on the density functional theory (DFT) using the B3LYP functional and 6–31G(d) basis set.

## 2. Synthesis and characterizations

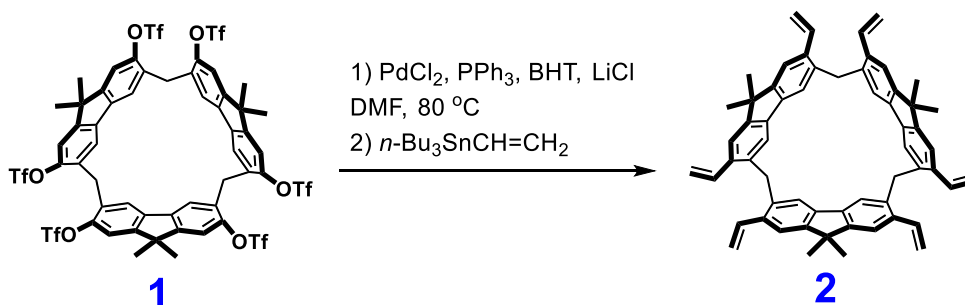

To a Schlenk tube was added **1** (750 mg, 0.5 mmol), PdCl<sub>2</sub>(44 mg, 0.25 mmol), PPh<sub>3</sub> (131 mg, 0.5 mmol), BHT (55 mg, 0.25 mmol) and LiCl (840 mg, 20 mmol) under the protection of argon. Under the protection of argon, ultra-dry DMF (20 mL) was added. The reaction mixture was stirred at 80 °C under the protection of argon for 12h. The *n*-Bu<sub>3</sub>SnCH=CH<sub>2</sub> (2.3 mL, 8 mmol) was added in one shot to the mixture, and the reaction mixture was stirred at 80 °C under the protection of argon

for another 12h. After cooling down to room temperature, the reaction mixture was poured into an aqueous solution of KOH (~5M, 100 mL) and the resulting mixture was extracted with DCM (3 × 50 mL). The organic layer was concentrated using a rotavapor. The residue was chromatographed on a silica gel column using a mixture of *n*-hexane and DCM (V: V = 8: 0 to 8: 1) as mobile phase to give pure product **2** (240 mg, 85%) as a white solid. M.p.: >280 °C. <sup>1</sup>H NMR (500 MHz, CDCl<sub>3</sub>, 298 K): δ 7.53 (s, 6H), 7.44 (s, 6H), 7.12 (dd, *J* = 17.2, 11.0 Hz, 6H), 5.69 (d, *J* = 17.3 Hz, 6H), 5.32 (d, *J* = 10.9 Hz, 6H), 4.13 (s, 6H), 1.51 (s, 18H). <sup>13</sup>C NMR (126 MHz, CDCl<sub>3</sub>, 298 K): δ 152.3, 138.7, 137.1, 136.0, 135.5, 121.6, 120.2, 115.5, 46.6, 35.0, 27.5. MALDI-TOF-HRMS: *m/z* calcd for [M]<sup>+</sup>: C<sub>60</sub>H<sub>54</sub><sup>+</sup>: 774.4226, found 774.4224.

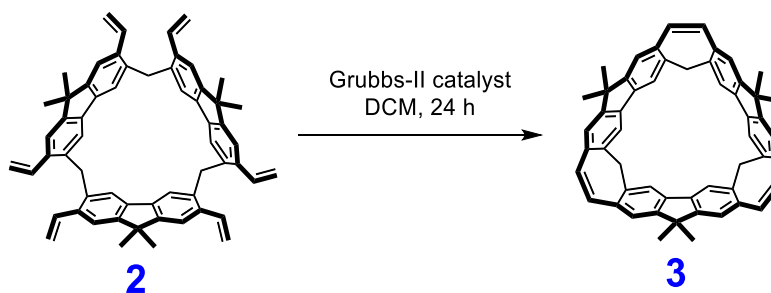

To a Schlenk tube was added **2** (77.4 mg, 0.1 mmol) and the Grubbs-II catalyst (136mg, 0.16 mmol) in dry DCM (5 mL) under argon. The mixture was refluxed for 12 h. After cooling down to room temperature, the reaction mixture was concentrated using a rotavapor. The residue was chromatographed on a silica gel column (230-400 mesh) using a mixture of petroleum ether and DCM (V: V = 8: 1) as mobile phase to give pure product **3** (32 mg, 70%) as a white solid. M.p.: >280 °C. <sup>1</sup>H NMR (700 MHz, CDCl<sub>3</sub>, 298 K): δ 7.57 (s, 6H), 7.08 (s, 6H), 7.07 (s, 6H), 3.96 (d, *J* = 11.8 Hz, 3H), 3.56 (d, *J* = 11.8 Hz, 3H), 1.48 (s, 9H), 1.06 (s, 9H). <sup>13</sup>C NMR (176 MHz, CDCl<sub>3</sub>, 298 K): δ 151.4, 140.3, 137.9, 133.8, 130.9, 121.0, 118.2, 47.0, 41.0, 28.8, 25.9. MALDI-TOF-HRMS: *m/z* calcd for [M]<sup>+</sup>: C<sub>54</sub>H<sub>42</sub><sup>+</sup>: 690.3287, found 690.3281.

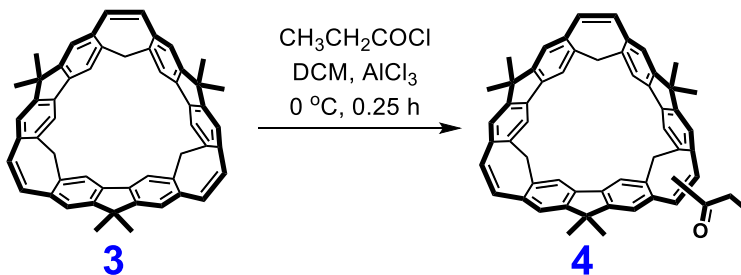

To a 5.0 mL flask was added **3** (13.8 mg, 0.02 mmol) and dry DCM (2.0 mL) under argon. The solution was cooled down to  $0\text{ }^\circ\text{C}$ , then  $\text{AlCl}_3$  (2.7 mg, 0.02 mmol) was added quickly. The mixture was stirred for 5 minute and the solution of propionyl chloride (1.9 mg, 0.02 mmol) in dry DCM was added in one shot. The reaction was kept for 0.25 hour and quenched by adding distilled water. The mixture was heavily stirred for 1.0 hour and extracted three times. The organic phase was concentrated using a rotavapor at room temperature. The residue was chromatographed on a silica gel column (230 -400 mesh) using a mixture of *n*-hexane and DCM (V: V = 1: 5) as mobile phase to give pure product **4** (8.3 mg, 56%). M.p.:  $>280\text{ }^\circ\text{C}$ .  $^1\text{H}$  NMR (700 MHz,  $\text{CD}_2\text{Cl}_2$ , 298 K):  $\delta$  7.92 (s, 1H), 7.63 (s, 1H), 7.61 (s, 1H), 7.52 (s, 1H), 7.49 (s, 1H), 7.46 (d,  $J = 3.3\text{ Hz}$ , 2H), 7.19 (s, 1H), 7.18 (s, 1H), 7.18 (s, 1H), 7.07 (s, 1H), 7.06 (s, 1H), 7.05 (s, 1H), 7.04 (s, 1H), 5.61 (d,  $J = 2.9\text{ Hz}$ , 2H), 3.99 (d,  $J = 12.6\text{ Hz}$ , 1H), 3.91 (dd,  $J = 24.8, 12.1\text{ Hz}$ , 2H), 3.79 (d,  $J = 12.7\text{ Hz}$ , 1H), 3.61 (dd,  $J = 13.9, 12.1\text{ Hz}$ , 2H), 3.02 (ddd,  $J = 17.1, 14.6, 7.3\text{ Hz}$ , 1H), 2.90 (dq,  $J = 17.2, 7.3\text{ Hz}$ , 1H), 1.49 (s, 3H), 1.48 (s, 3H), 1.40 (s, 3H), 1.20 (t,  $J = 7.3\text{ Hz}$ , 3H), 1.08 (s, 6H), 1.01 (s, 3H).  $^{13}\text{C}$  NMR (176 MHz,  $\text{CD}_2\text{Cl}_2$ , 298 K, TMS as standard):  $\delta$  202.7, 153.3, 153.2, 152.4, 152.2, 152.0, 151.9, 147.7, 141.93, 141.87, 141.41, 141.38, 141.2, 140.2, 139.89, 139.88, 139.75, 139.69, 139.6, 138.7, 138.4, 137.9, 136.8, 134.9, 133.3, 132.8, 131.5, 131.1, 130.6, 123.8, 122.2, 121.7, 121.1, 120.92, 120.86, 120.1, 120.0, 118.9, 118.72, 118.70, 118.5, 107.0, 48.2, 48.1, 46.7, 41.12, 41.11, 39.8, 33.2, 30.1, 29.6, 29.5, 28.7, 26.3, 25.2, 25.1, 9.0. MALDI-TOF-HRMS:  $m/z$  calcd for  $[\text{M}]^+$ :  $\text{C}_{57}\text{H}_{46}^+$ : 746.3549, found 746.3543.

### 3. NMR and mass spectra of new compounds

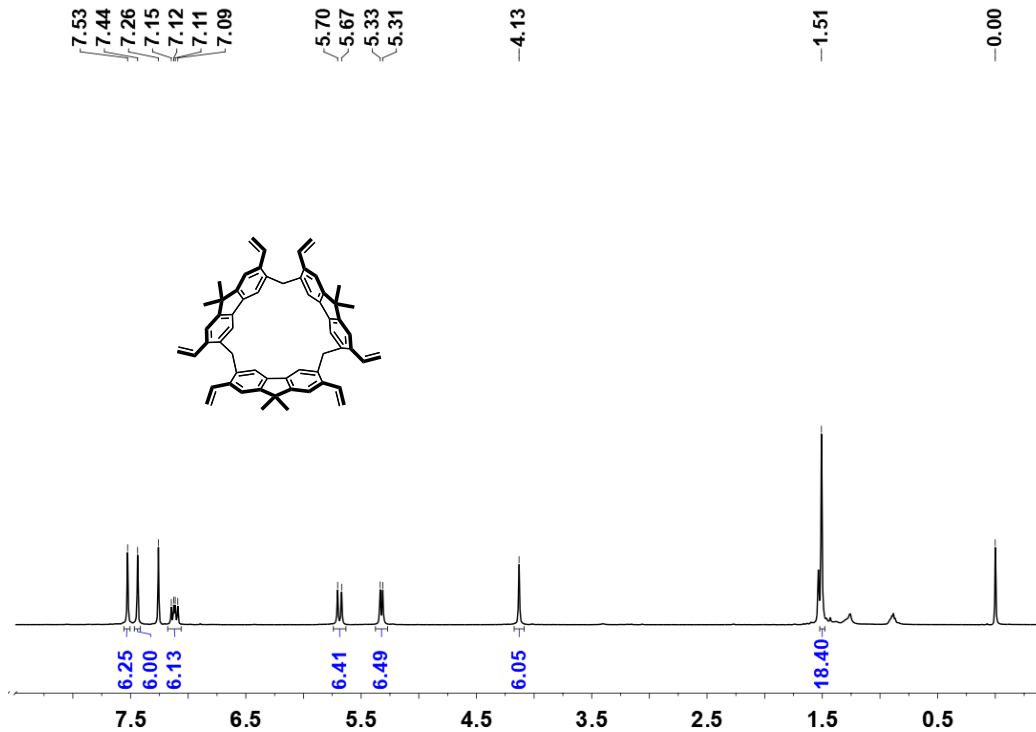

Fig. S1 <sup>1</sup>H NMR spectrum (500 MHz, CDCl<sub>3</sub>, 298 K) of 2.

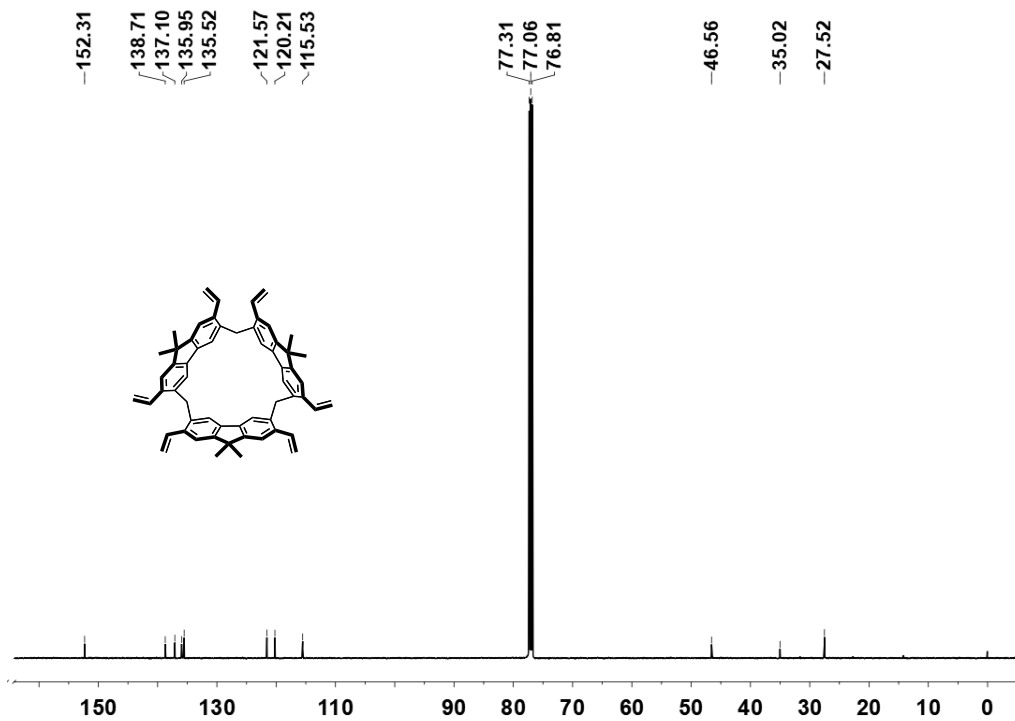

Fig. S2 <sup>13</sup>C NMR spectrum (126 MHz, CDCl<sub>3</sub>, 298 K) of 2.

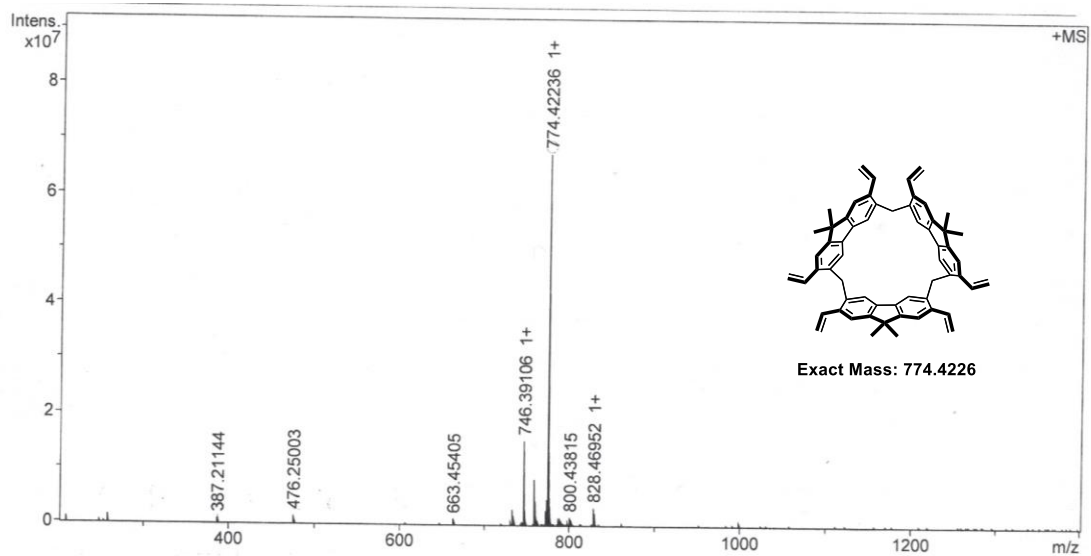

**Fig. S3** MALDI-TOF-HRMS spectrum of **2**.

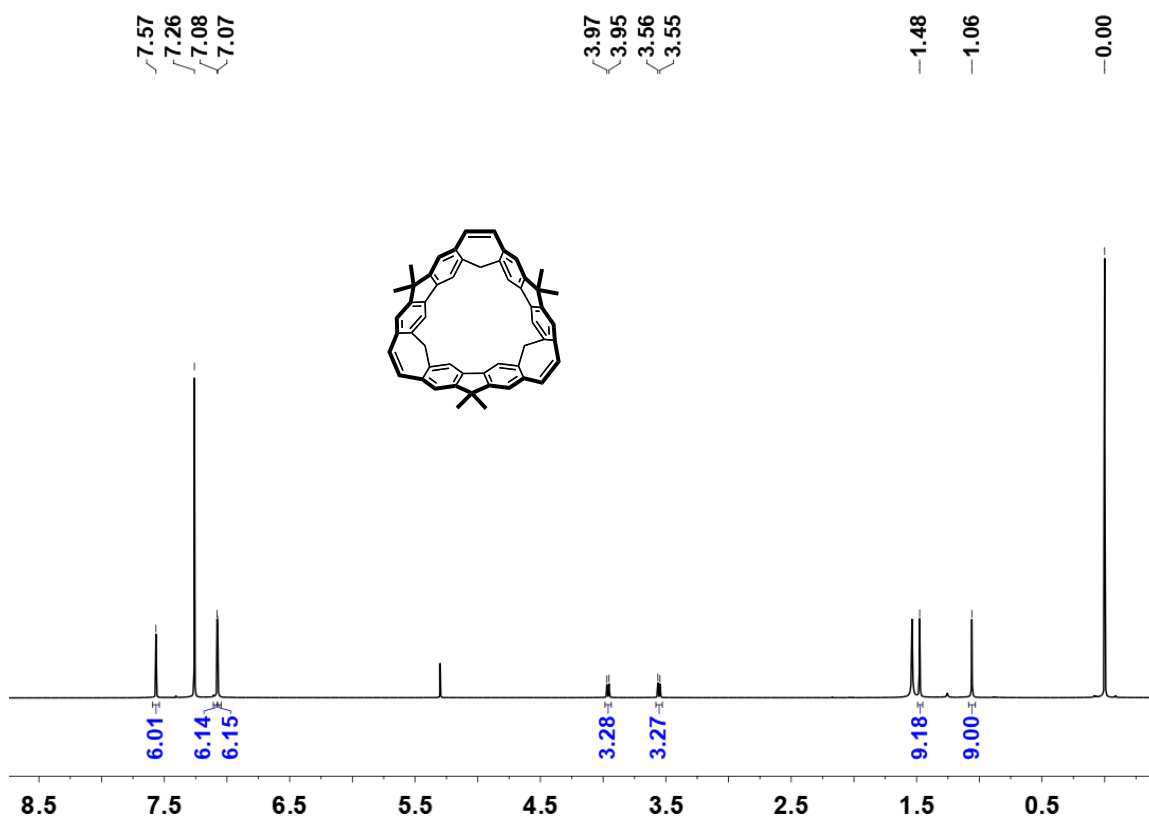

**Fig. S4** <sup>1</sup>H NMR spectrum (700 MHz, CDCl<sub>3</sub>, 298 K) of **3**.

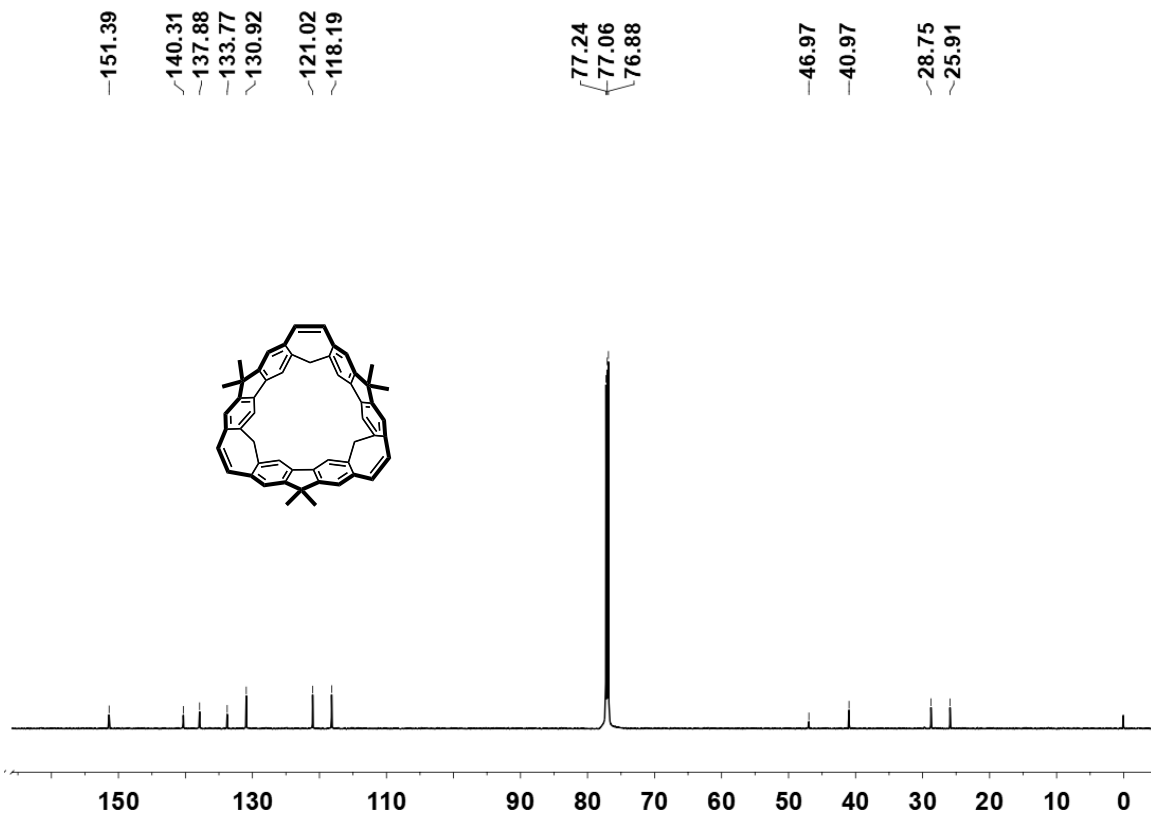

**Fig. S5**  $^{13}\text{C}$  NMR spectrum (176 MHz,  $\text{CDCl}_3$ , 298 K) of **3**.

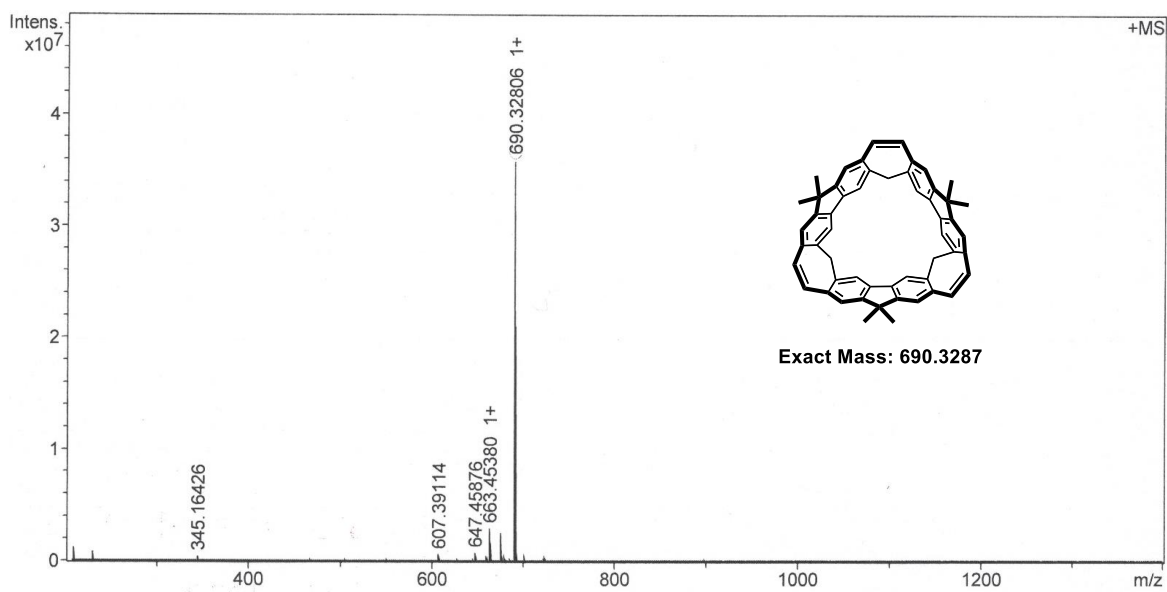

**Fig. S6** MALDI-TOF-HRMS spectrum of **3**.



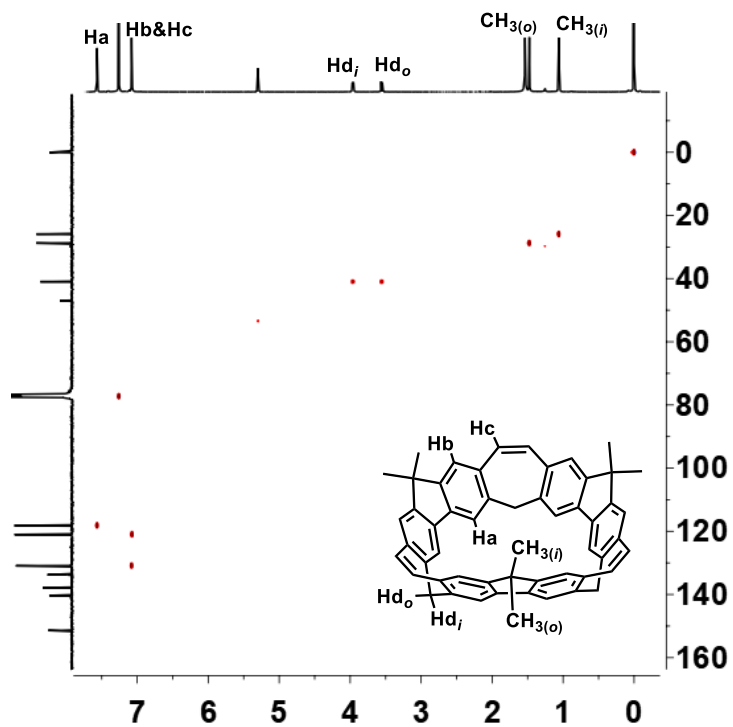

**Fig. S7**  $^1\text{H}$ - $^{13}\text{C}$  HSQC spectrum (700 MHz,  $\text{CDCl}_3$ , 298 K) of **3**.

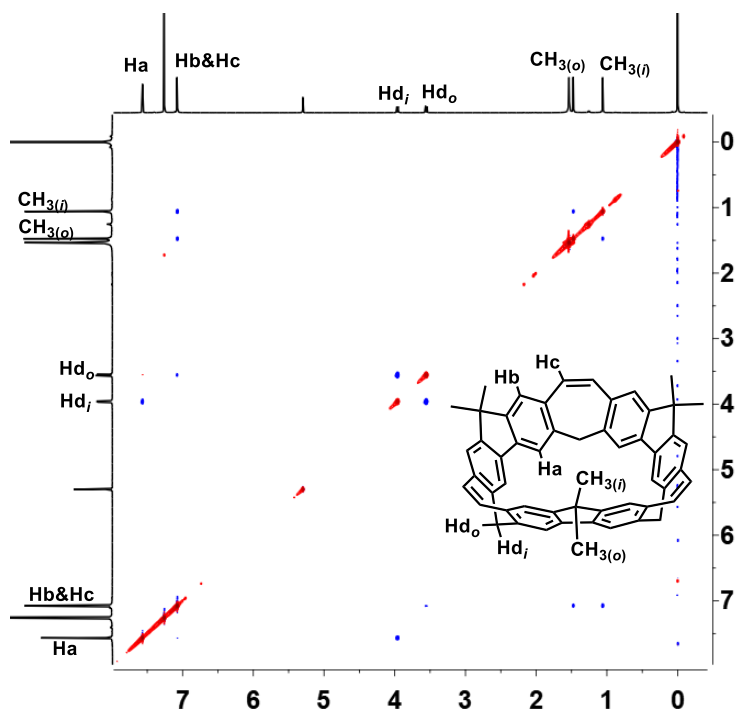

**Fig. S8** 2D NOESY spectrum (700 MHz,  $\text{CDCl}_3$ , 298 K) of **3**.

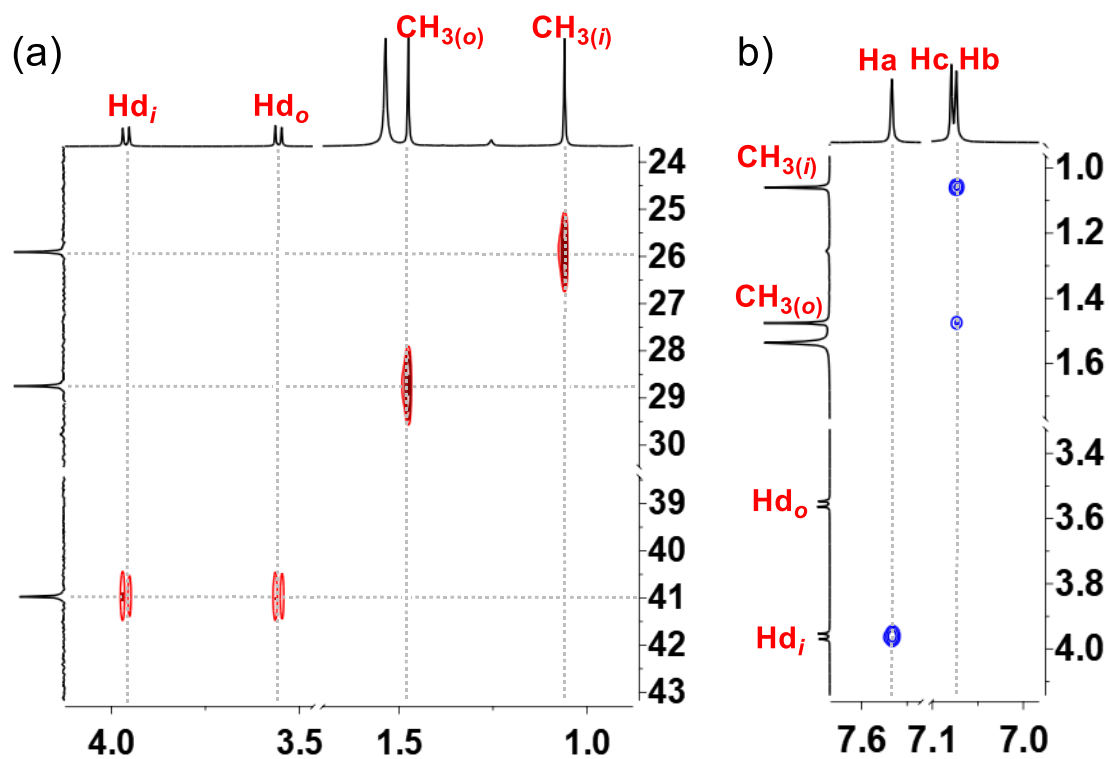

**Fig. S9** (a) Partial  $^1\text{H}$ - $^{13}\text{C}$  HSQC spectrum and (b) partial NOESY spectrum of **3**.

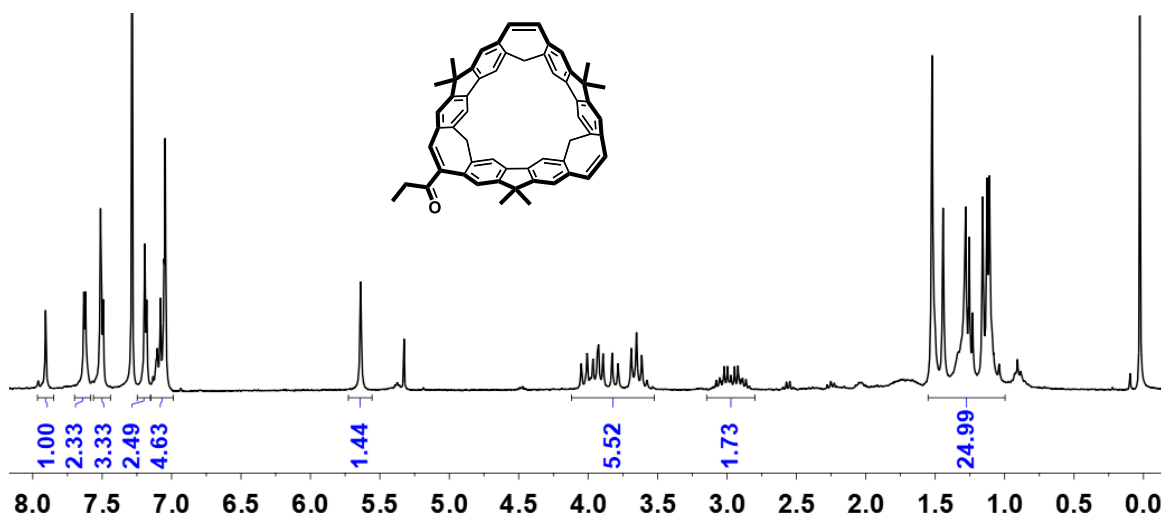

**Fig. S10**  $^1\text{H}$  NMR spectrum (300 MHz,  $\text{CDCl}_3$ , 298K) of **4** before HPLC resolution.

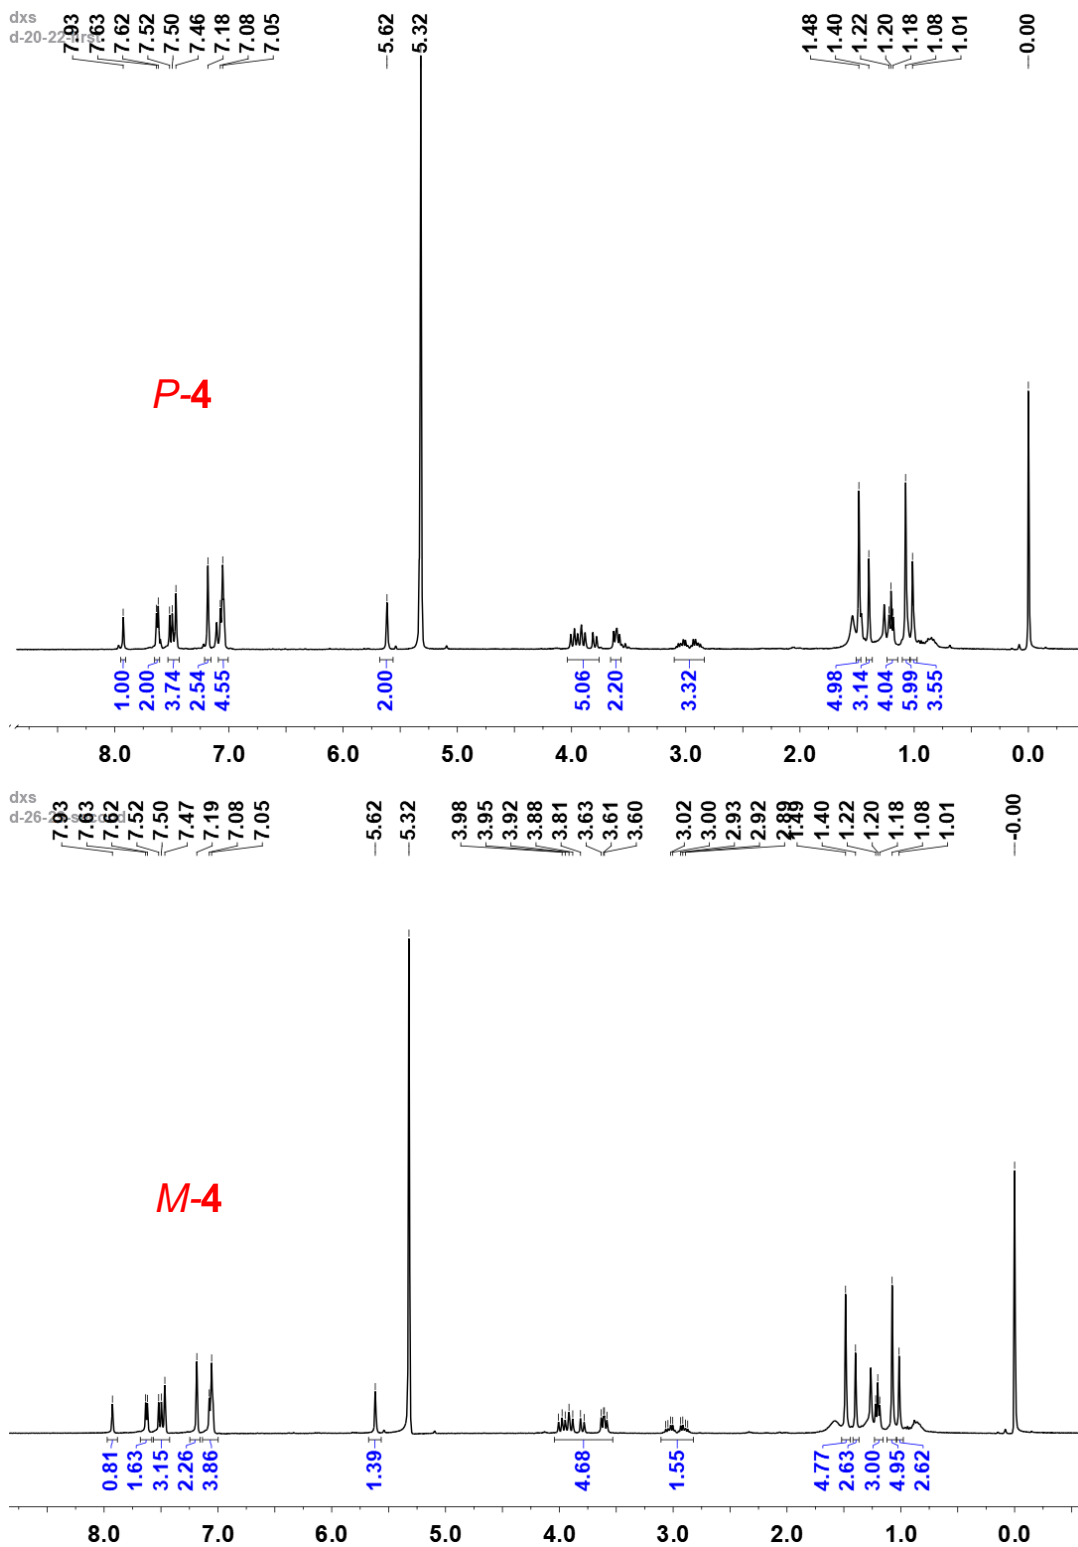

**Fig. S11**  $^1\text{H}$  NMR spectra (400 MHz,  $\text{CDCl}_3$ , 298K) of *P-4* and *M-4*.



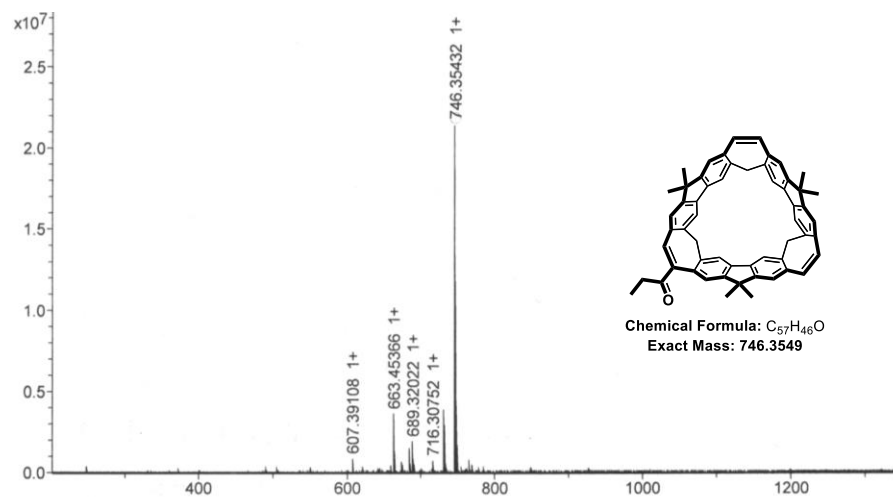

Fig. S14 MALDI-TOF-HRMS spectrum of 4.

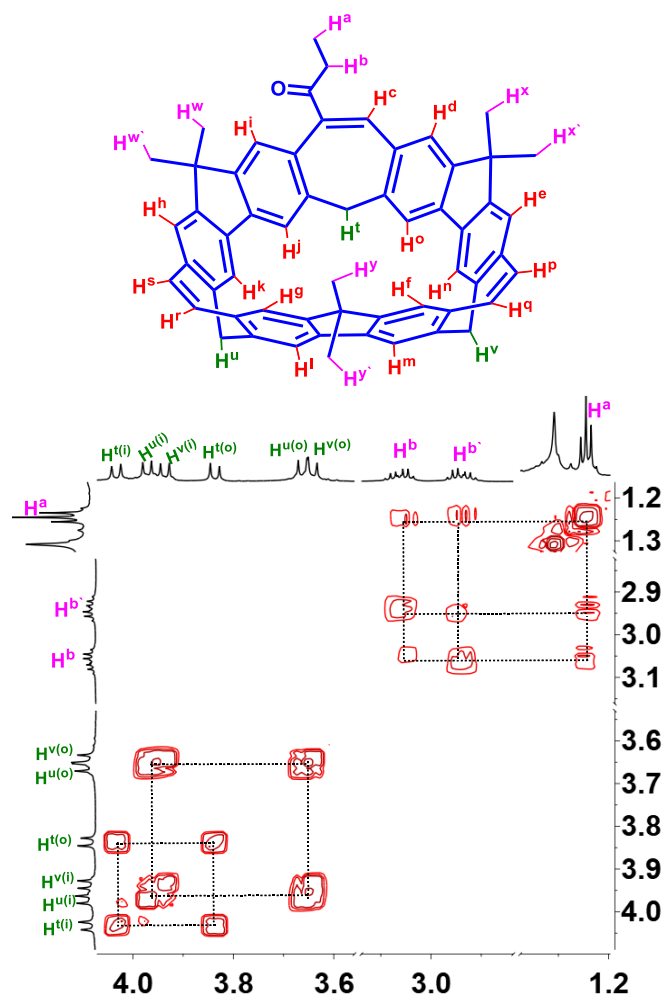

Fig. S15  $^1H$ - $^1H$  COSY spectrum (700 MHz,  $CDCl_3$ , 298 K) of *M*-4.

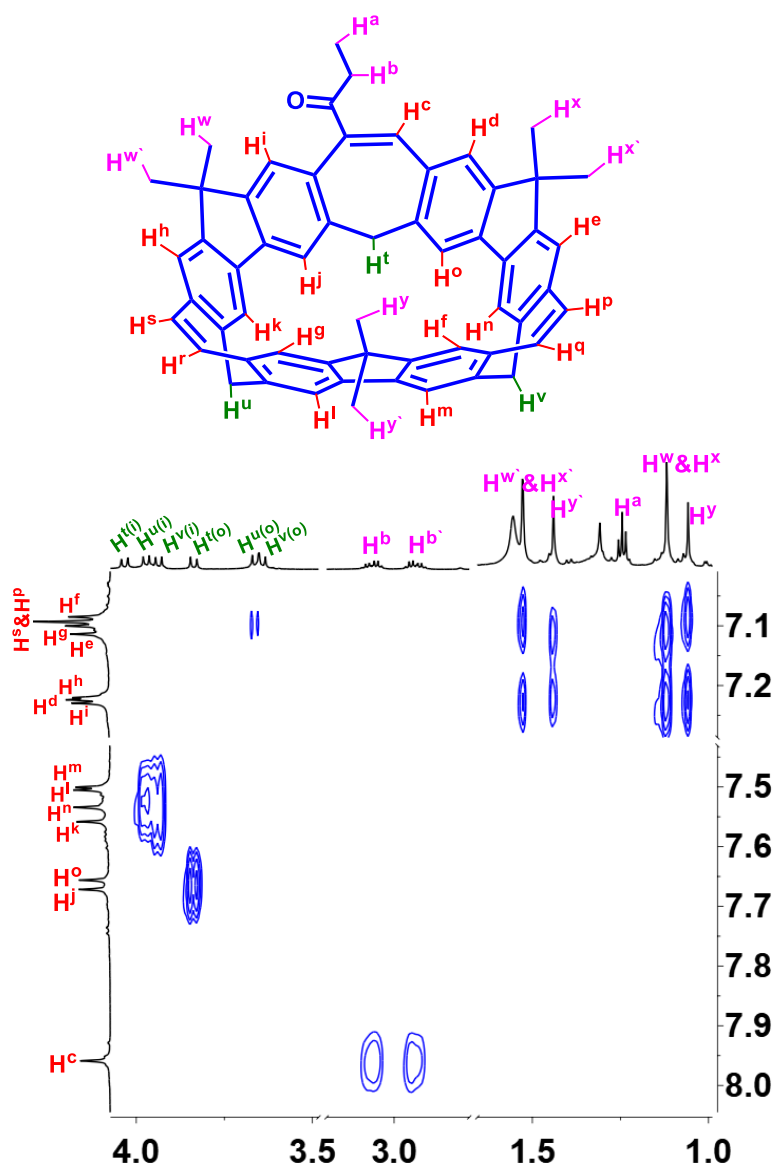

**Fig. S16** 2D NOESY spectrum (700 MHz,  $CDCl_3$ , 298 K) of *M-4*.

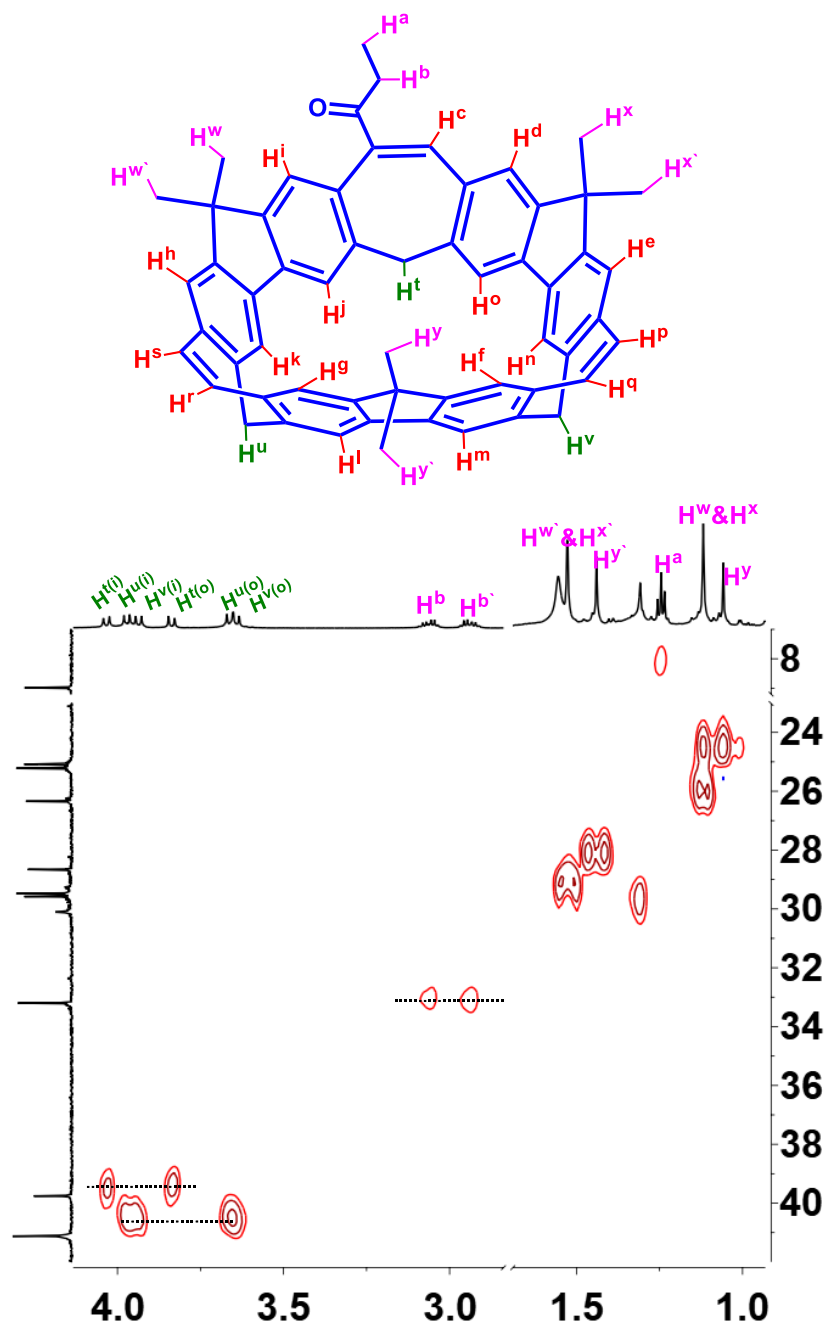

**Fig. S17**  $^1\text{H}$ - $^{13}\text{C}$  HSQC spectrum (700 MHz,  $\text{CDCl}_3$ , 298 K) of *M-4*.

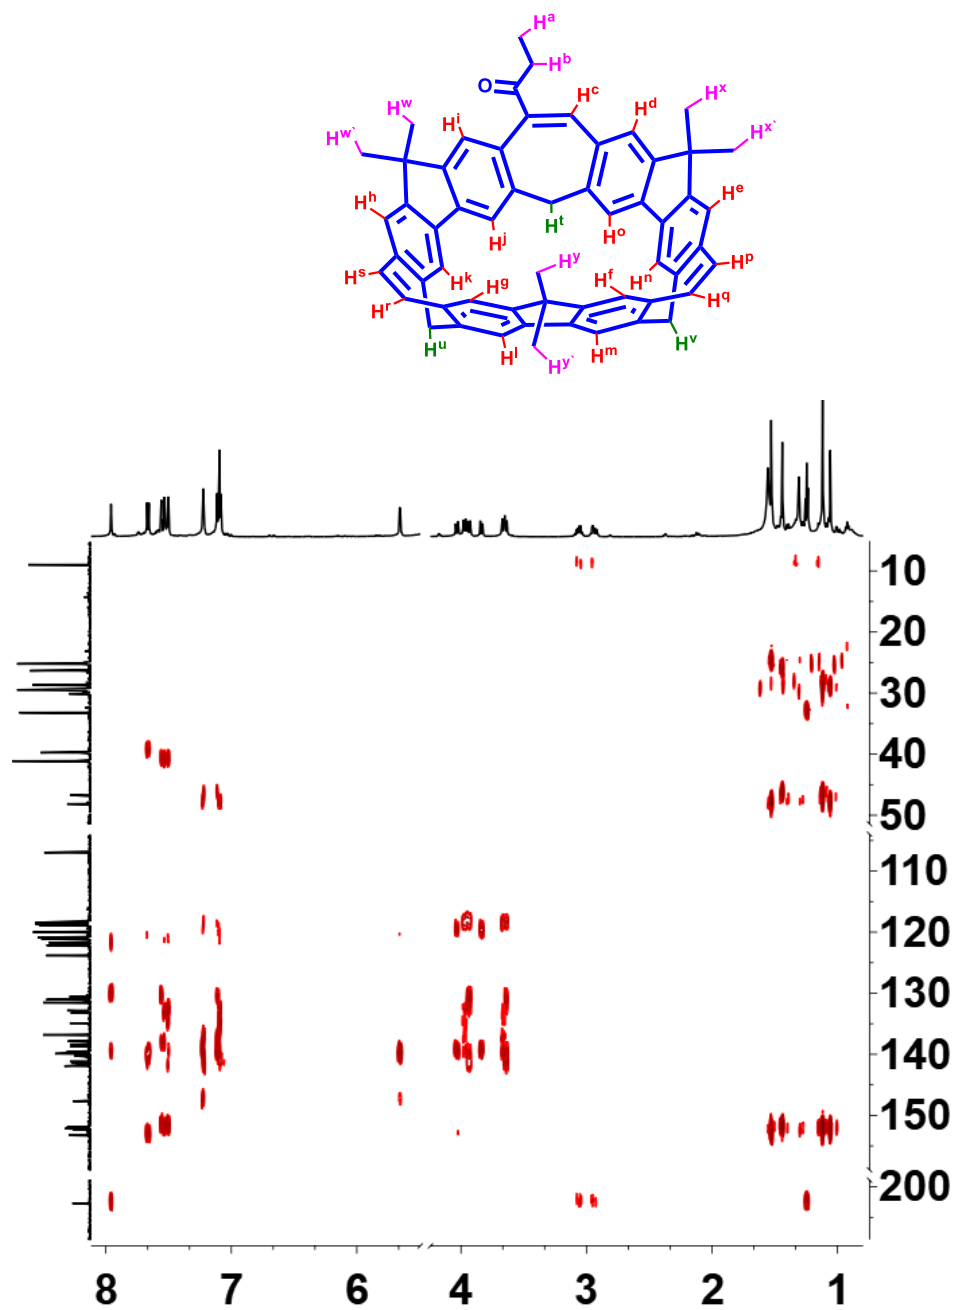

**Fig. S18** <sup>1</sup>H-<sup>13</sup>C HMBC spectrum (700 MHz, CDCl<sub>3</sub>, 298 K) of *M-4*.



## 4. HPLC resolution

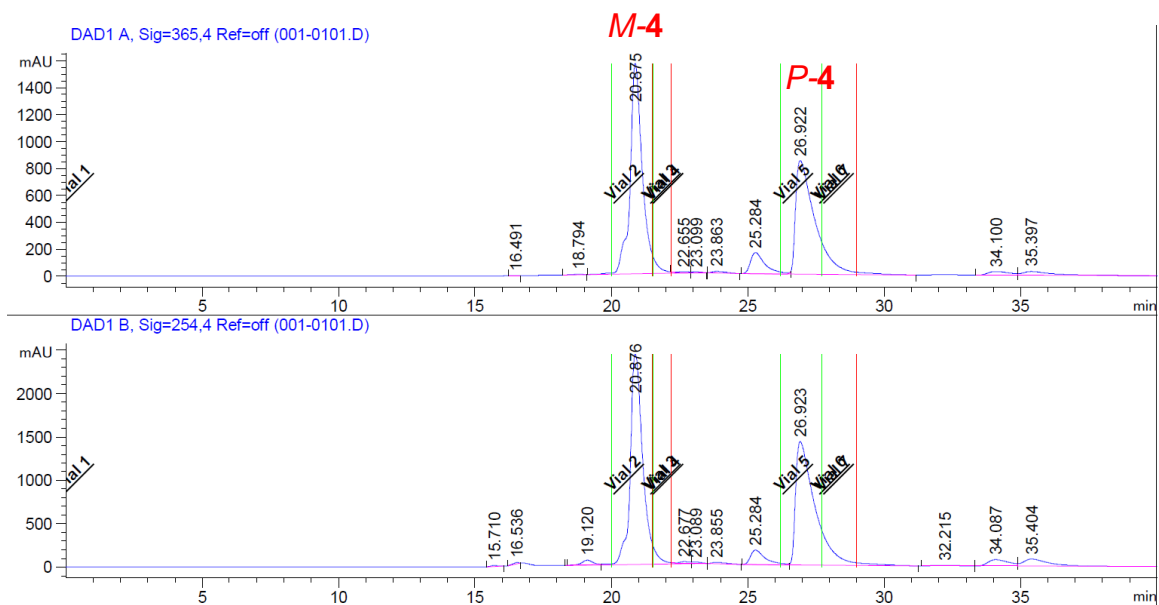

Fig. S19 HPLC resolution of **4**. DCM as mobile phase.

## 5. The X-ray crystal structures and crystallographic data

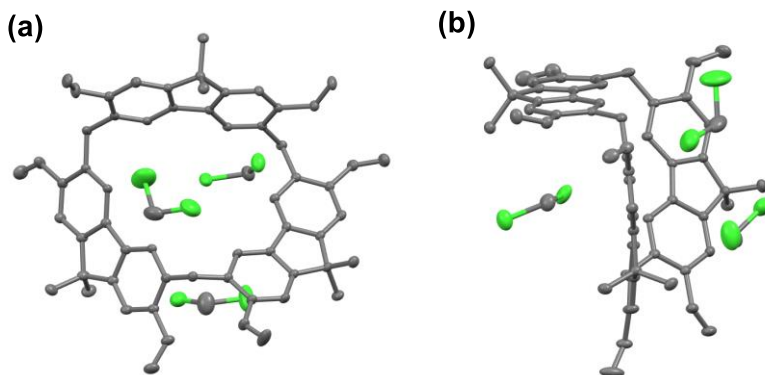

Fig. S20 ORTEP drawing of **2** from (a) top view and (b) side view (the thermal ellipsoids are displayed at a 30 % probability).

**Table S1.** Crystal Data and Structure Refinement for **2** (CCDC 2192655)

| Compound                                    | <b>2</b>                                                       |
|---------------------------------------------|----------------------------------------------------------------|
| Empirical formula                           | C <sub>63</sub> H <sub>60</sub> Cl <sub>6</sub>                |
| Formula weight                              | 1029.81                                                        |
| Temperature/K                               | 170.00(10)                                                     |
| Crystal system                              | triclinic                                                      |
| Space group                                 | P-1                                                            |
| a/Å                                         | 12.9068(3)                                                     |
| b/Å                                         | 14.7144(3)                                                     |
| c/Å                                         | 16.1660(4)                                                     |
| α/°                                         | 71.467(2)                                                      |
| β/°                                         | 69.769(2)                                                      |
| γ/°                                         | 79.6845(19)                                                    |
| Volume/Å <sup>3</sup>                       | 2723.10(12)                                                    |
| Z                                           | 2                                                              |
| ρ <sub>calc</sub> /cm <sup>3</sup>          | 1.256                                                          |
| μ/mm <sup>-1</sup>                          | 3.169                                                          |
| F(000)                                      | 1080.0                                                         |
| Crystal size/mm <sup>3</sup>                | 0.28 × 0.18 × 0.05                                             |
| Radiation                                   | CuKα (λ = 1.54184)                                             |
| 2θ range for data collection/°              | 6.064 to 154.666                                               |
| Index ranges                                | -16 ≤ h ≤ 16, -18 ≤ k ≤ 18, -20 ≤ l ≤ 20                       |
| Reflections collected                       | 35753                                                          |
| Independent reflections                     | 10991 [R <sub>int</sub> = 0.0242, R <sub>sigma</sub> = 0.0225] |
| Data/restraints/parameters                  | 10991/0/638                                                    |
| Goodness-of-fit on F <sup>2</sup>           | 1.722                                                          |
| Final R indexes [I ≥ 2σ (I)]                | R <sub>1</sub> = 0.1003, wR <sub>2</sub> = 0.3483              |
| Final R indexes [all data]                  | R <sub>1</sub> = 0.1033, wR <sub>2</sub> = 0.3549              |
| Largest diff. peak/hole / e Å <sup>-3</sup> | 1.36/-1.49                                                     |

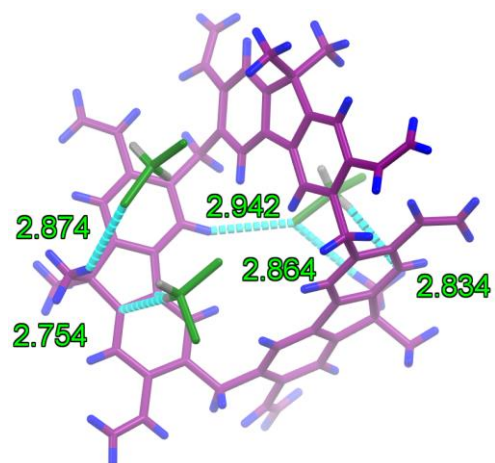

**Fig. S21** Illustration of Cl<sub>2</sub>C-H···π interaction between **2** and CH<sub>2</sub>Cl<sub>2</sub>.

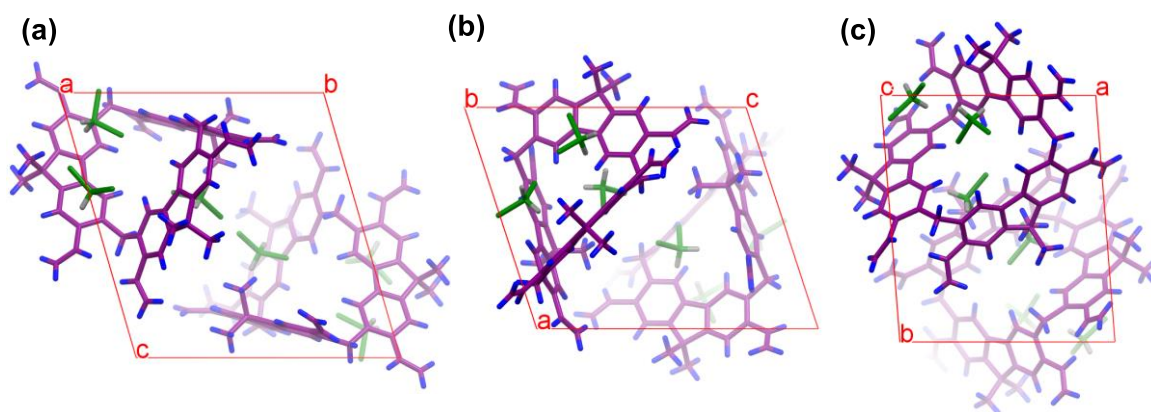

**Fig. S22** Packing of **2** in the solid state.

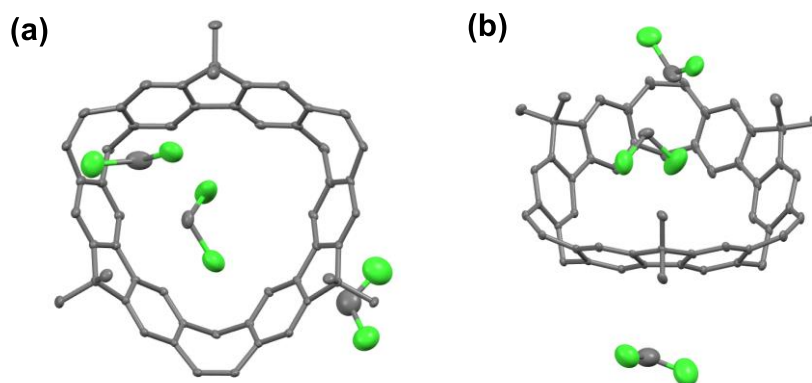

**Fig. S23** ORTEP drawing of **3** from (a) top view and (b) side view (the thermal ellipsoids are displayed at a 60 % probability).

**Table S2.** Crystal Data and Structure Refinement for **3** (CCDC 2192656)

| Compound                                    | <b>3</b>                                                       |
|---------------------------------------------|----------------------------------------------------------------|
| Empirical formula                           | C <sub>57</sub> H <sub>48</sub> Cl <sub>6</sub>                |
| Formula weight                              | 945.65                                                         |
| Temperature/K                               | 169.99(11)                                                     |
| Crystal system                              | monoclinic                                                     |
| Space group                                 | P2 <sub>1</sub> /c                                             |
| a/Å                                         | 13.6999(2)                                                     |
| b/Å                                         | 27.5753(4)                                                     |
| c/Å                                         | 14.7599(2)                                                     |
| α/°                                         | 90                                                             |
| β/°                                         | 117.155(2)                                                     |
| γ/°                                         | 90                                                             |
| Volume/Å <sup>3</sup>                       | 4961.36(16)                                                    |
| Z                                           | 4                                                              |
| ρ <sub>calc</sub> /cm <sup>3</sup>          | 1.266                                                          |
| μ/mm <sup>-1</sup>                          | 3.434                                                          |
| F(000)                                      | 1968.0                                                         |
| Crystal size/mm <sup>3</sup>                | 0.28 × 0.18 × 0.05                                             |
| Radiation                                   | Cu Kα (λ = 1.54184)                                            |
| 2θ range for data collection/°              | 6.41 to 156.104                                                |
| Index ranges                                | -17 ≤ h ≤ 17, -34 ≤ k ≤ 32, -18 ≤ l ≤ 15                       |
| Reflections collected                       | 71868                                                          |
| Independent reflections                     | 10177 [R <sub>int</sub> = 0.0494, R <sub>sigma</sub> = 0.0259] |
| Data/restraints/parameters                  | 10177/46/593                                                   |
| Goodness-of-fit on F <sup>2</sup>           | 2.244                                                          |
| Final R indexes [I ≥ 2σ (I)]                | R <sub>1</sub> = 0.1510, wR <sub>2</sub> = 0.4300              |
| Final R indexes [all data]                  | R <sub>1</sub> = 0.1564, wR <sub>2</sub> = 0.4451              |
| Largest diff. peak/hole / e Å <sup>-3</sup> | 2.05/-1.65                                                     |

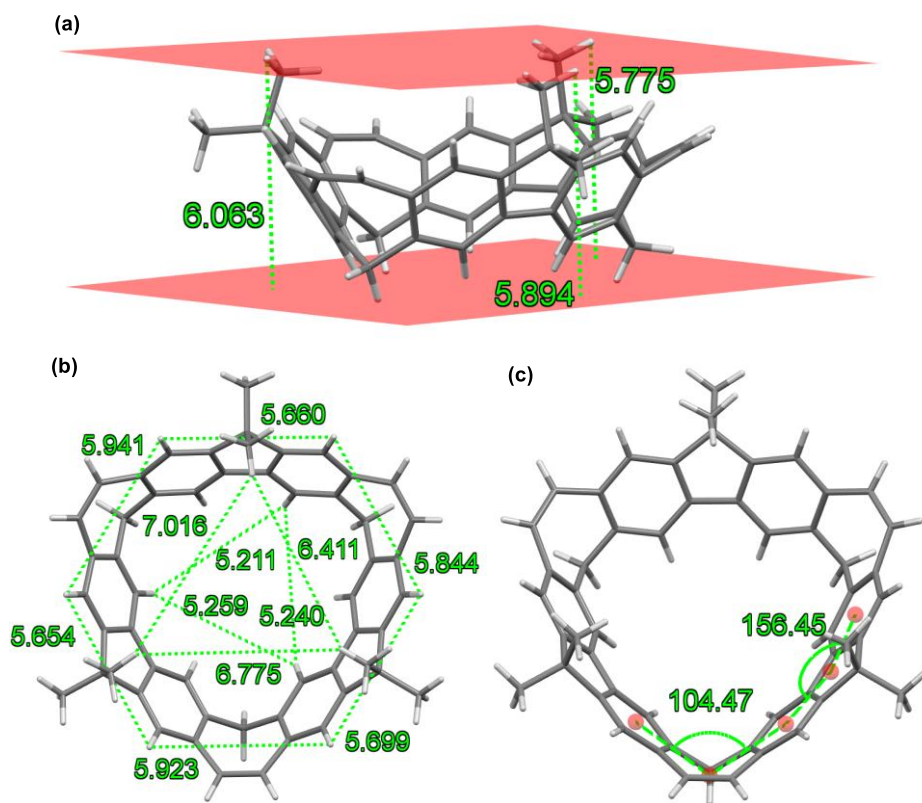

**Fig. S24** Cavity size and distortion angle measurements of **3**.

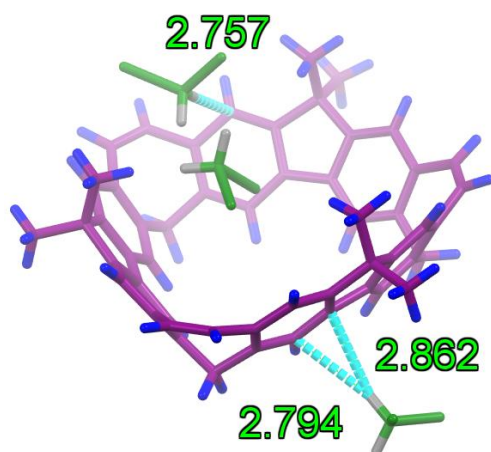

**Fig. S25** Illustration of Cl<sub>2</sub>C-H... $\pi$  interaction between **3** and CH<sub>2</sub>Cl<sub>2</sub>.

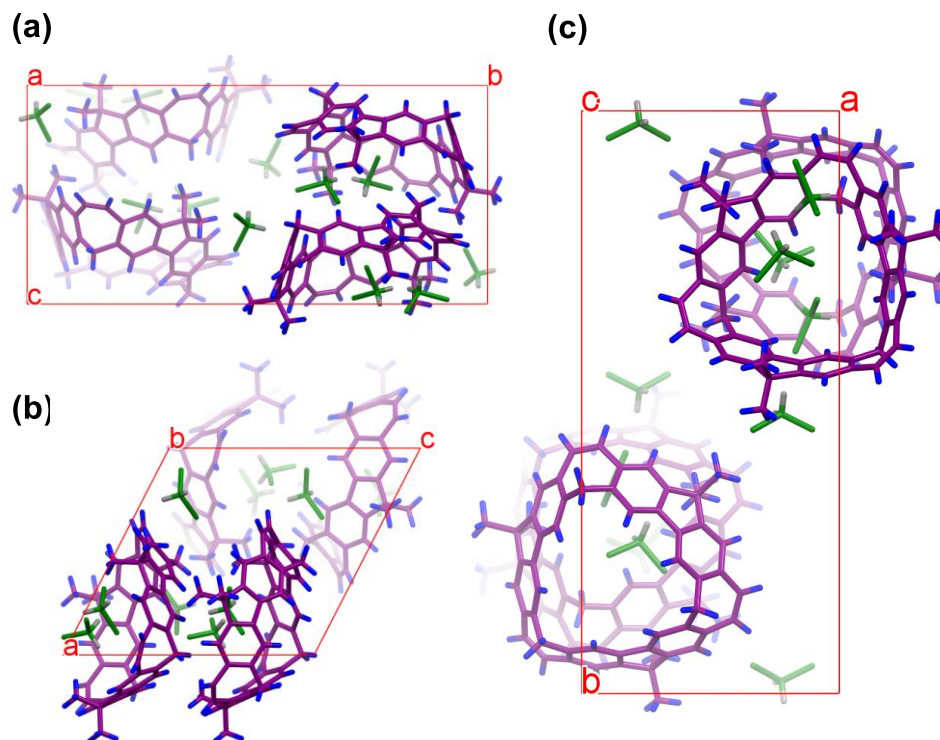

**Fig. S26** Packing of **3** in the solid state.

## 6. Photophysical properties

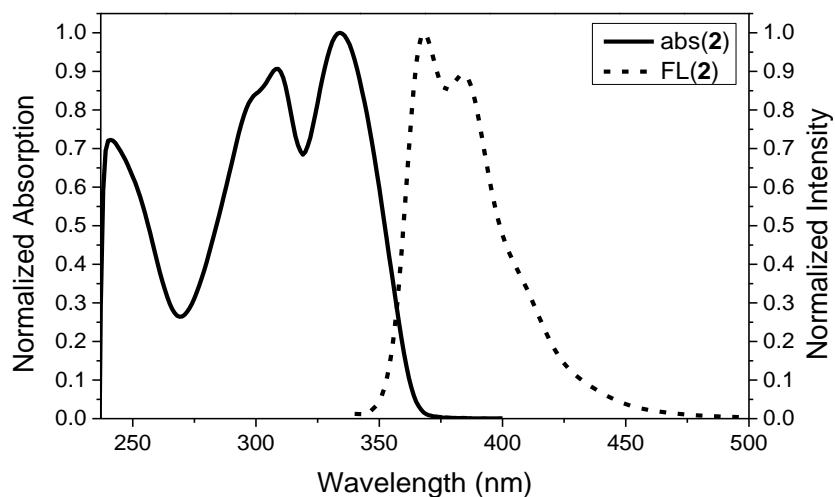

**Fig. S27** UV-vis absorption spectrum (solid line) and normalized fluorescent spectrum (dashed line) of **2**,  $[2] = 1.0 \times 10^{-5}$  M.

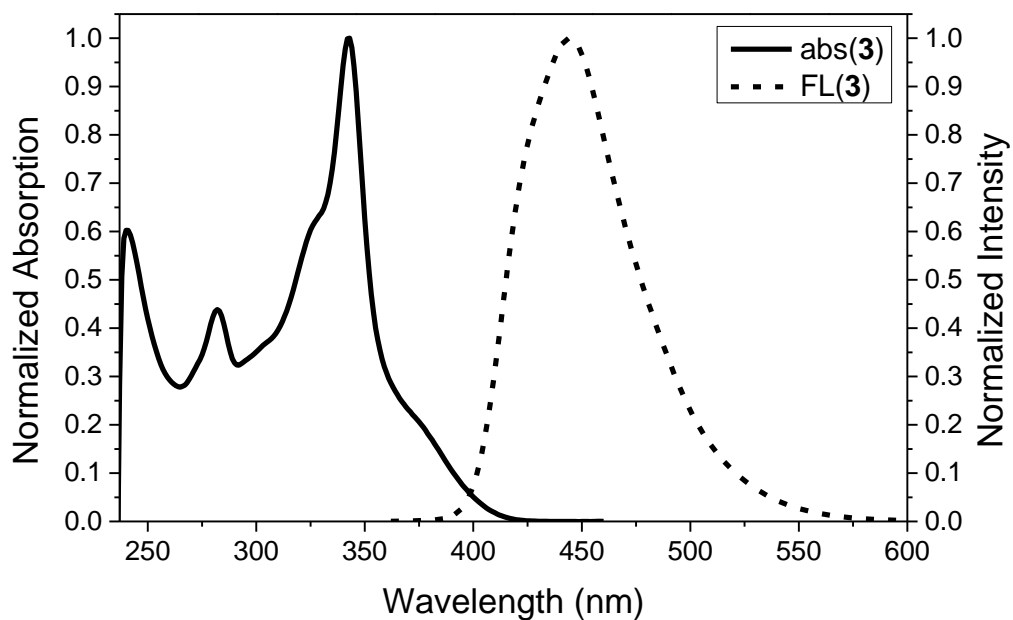

**Fig. S28** UV-vis absorption spectrum (solid line) and normalized fluorescent spectrum (dashed line) of **3**,  $[3] = 1.0 \times 10^{-5}$  M.

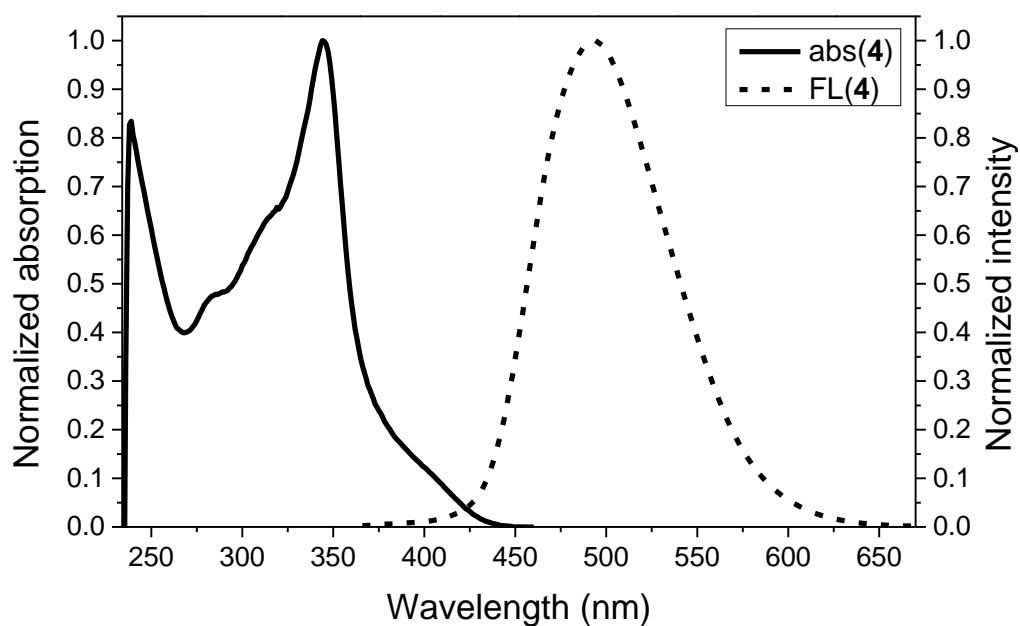

**Fig. S29** UV-vis absorption spectrum (solid line) and normalized fluorescent spectrum (dashed line) of **4**,  $[4] = 1.0 \times 10^{-5}$  M.

## 7. Circular dichroism

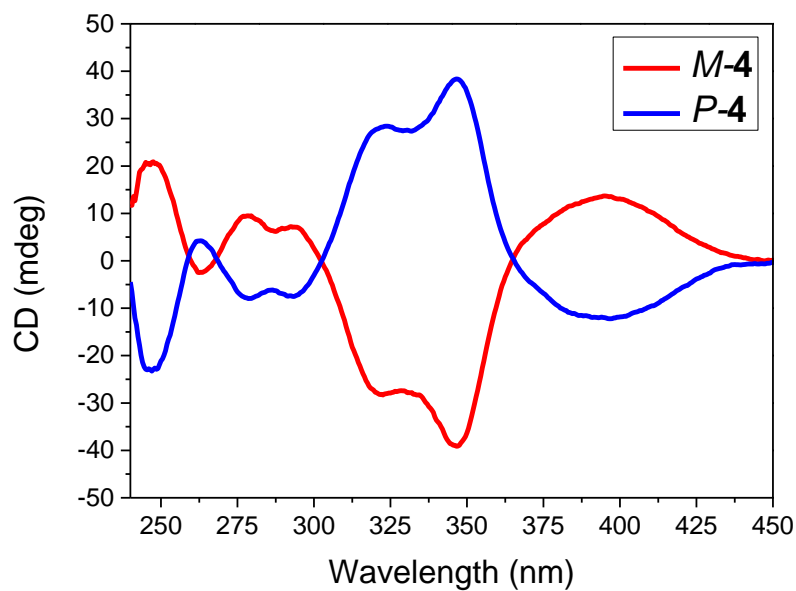

**Fig. S30** CD spectra of **4**,  $[4] = 1.0 \times 10^{-5}$  M.

## 8. Circularly polarized luminescence

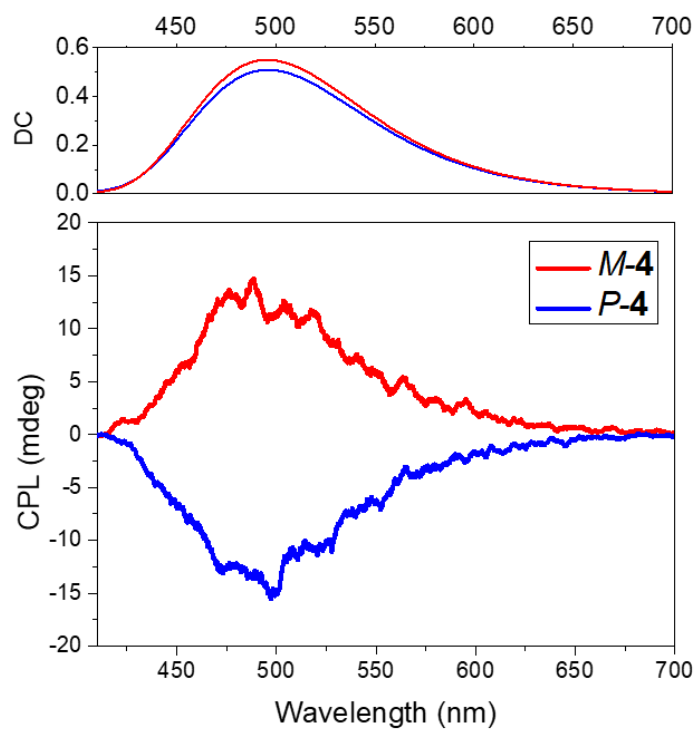

**Fig. S31** CPL of **4**,  $[4] = 1.0 \times 10^{-5}$  M.



## 9. Theoretical calculations

### 9.1 Calculated UV-vis spectra

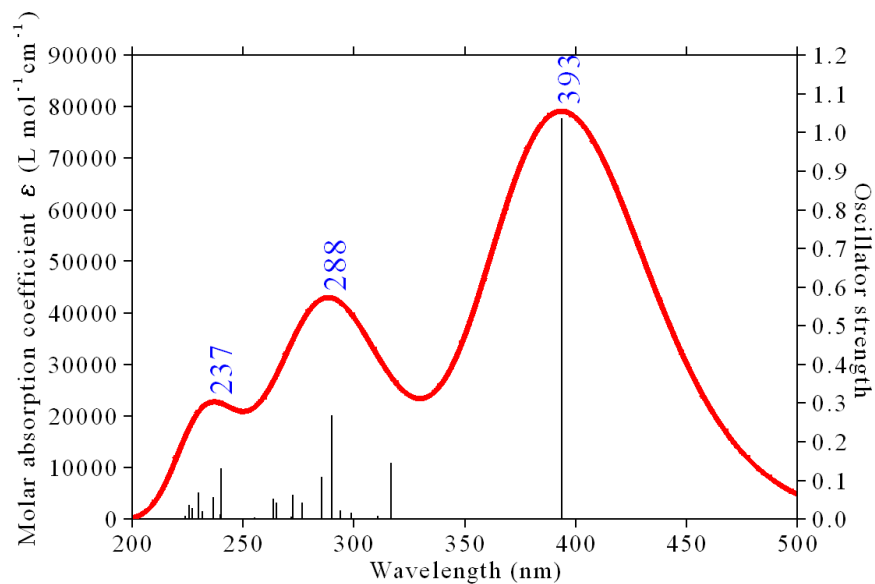

Fig. S32 Simulated UV-vis spectrum of 3.

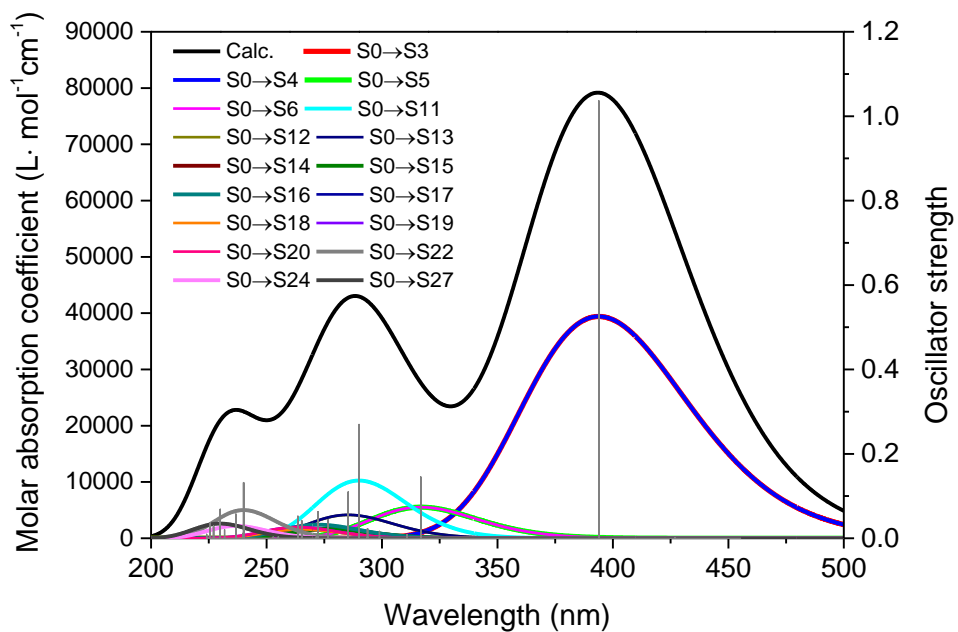

Fig. S33 Major electronic transitions ( $f > 0.02$ ) of the main absorption bands for 3.

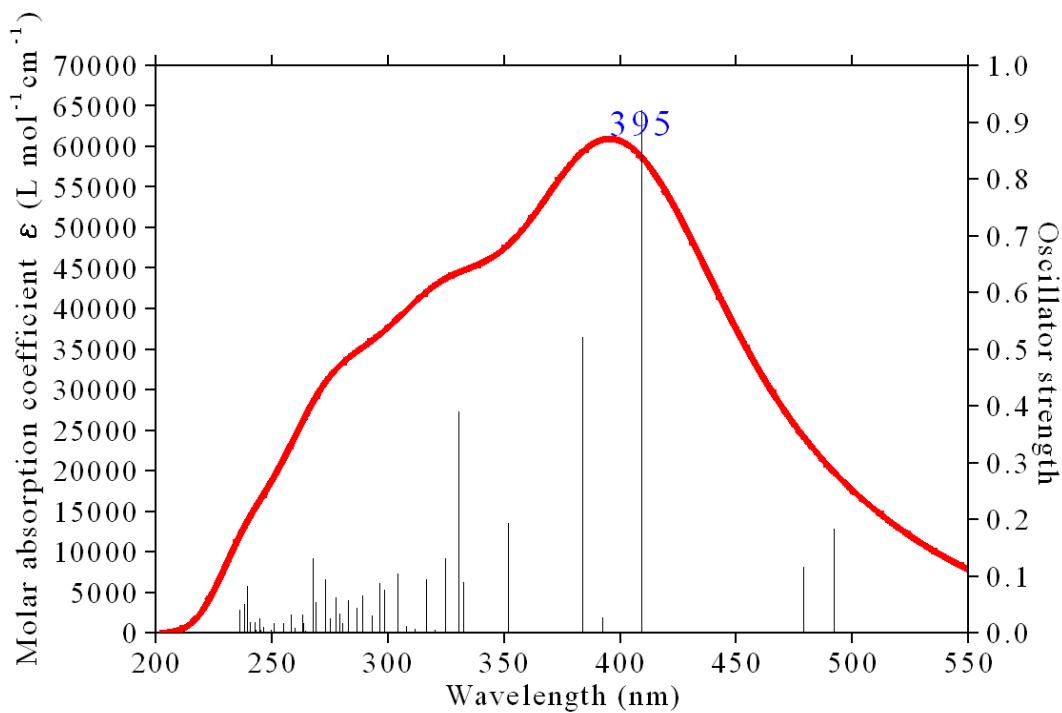

**Fig. S34** Simulated UV-vis spectrum of **4**.

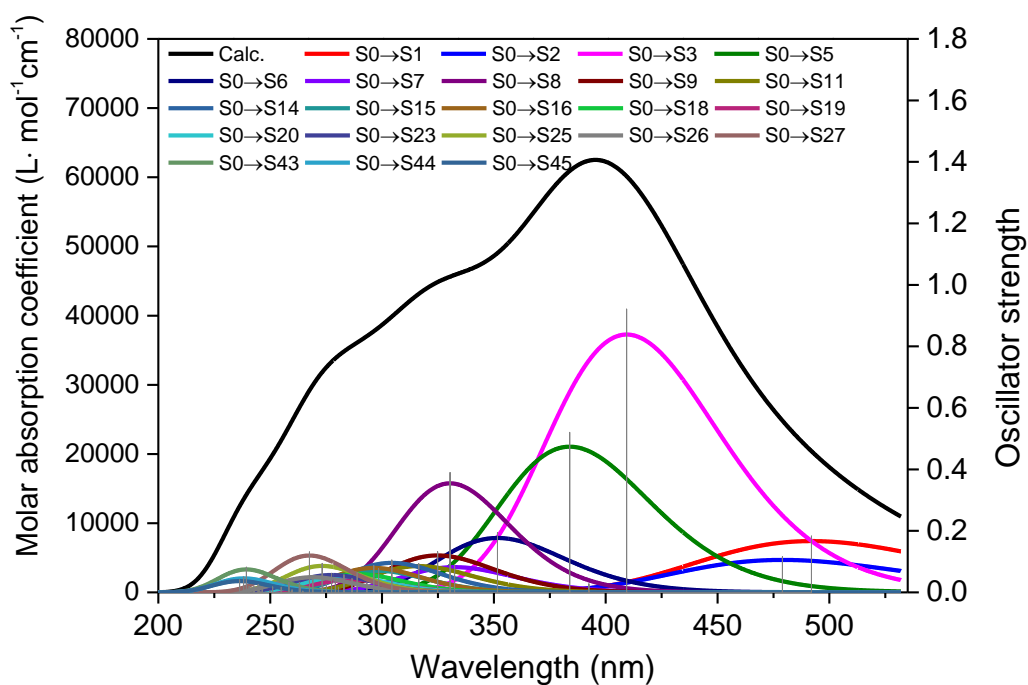

**Fig. S35** Major electronic transitions ( $f > 0.04$ ) of the main absorption bands for **4**.

## 9.2 Calculated ECD spectra of 4

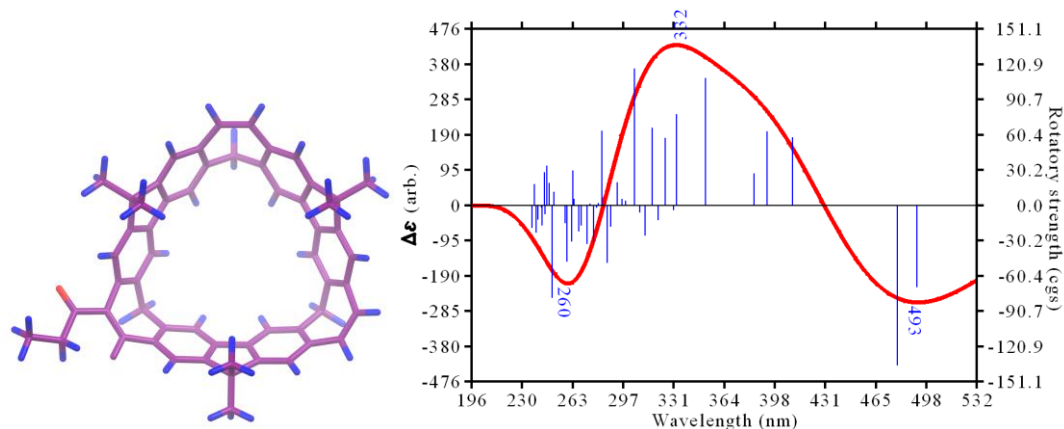

Fig. S36 Simulated ECD spectrum of *P*-4.

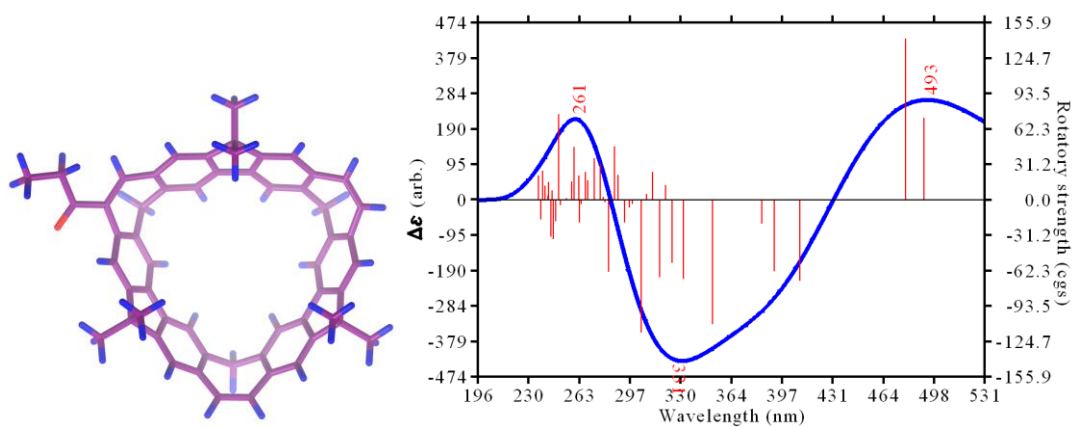

Fig. S37 Simulated ECD spectrum of *M*-4.

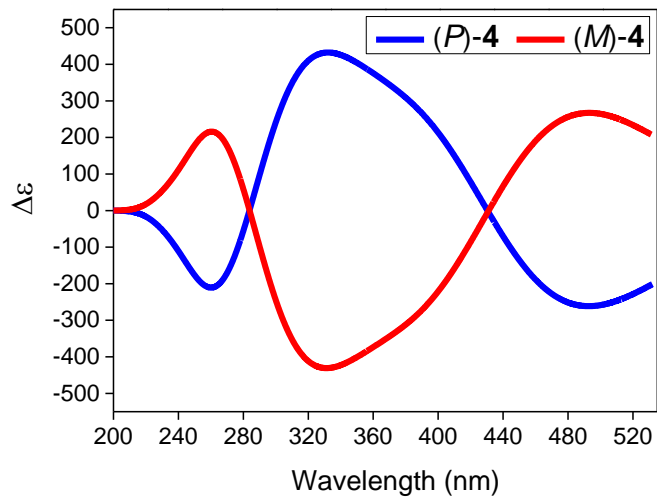

Fig. S38 Simulated ECD spectrum of 4.

### 9.3 TD-DFT vertical one-electron excitations

**Table S3.** Major Electronic Transitions for **3** by TD-DFT Method Using B3LYP/6-31G(d).

|     | energy (eV) | Excitation [nm] | Oscillator strength (f) | Description                                                                                                                   |
|-----|-------------|-----------------|-------------------------|-------------------------------------------------------------------------------------------------------------------------------|
| S1  | 2.7220      | 455.49          | 0.00000                 | H → L 49.8%, H-1 → L+1 49.6%                                                                                                  |
| S2  | 2.9047      | 426.84          | 0.00160                 | H-1 → L 49.7%, H → L+1 49.7%                                                                                                  |
| S3  | 3.1480      | 393.85          | 1.03590                 | H-1 → L+1 42.4%, H → L 42.2%, H → L+1 7.3%, H-1 → L 7.3%                                                                      |
| S4  | 3.1480      | 393.85          | 1.03620                 | H → L+1 42.3%, H-1 → L 42.3%, H-1 → L+1 7.3%, H → L 7.3%                                                                      |
| S5  | 3.9137      | 316.80          | 0.14520                 | H → L+2 47.3%, H-2 → L 27.3%                                                                                                  |
| S6  | 3.9139      | 316.78          | 0.14520                 | H-1 → L+2 47.3%, H-2 → L+1 27.4%                                                                                              |
| S7  | 3.9888      | 310.83          | 0.00810                 | H-2 → L 49.3%, H → L+2 36.1%, H-3 → L+1 7.8%                                                                                  |
| S8  | 3.9890      | 310.82          | 0.00810                 | H-2 → L+1 49.2%, H-1 → L+2 36.1%, H-3 → L 7.8%                                                                                |
| S9  | 4.1479      | 298.91          | 0.01660                 | H-5 → L 31.1%, H-4 → L+1 31.0%, H-4 → L 6.7%, H-5 → L+1 6.6%, H → L+5 5.6%, H-1 → L+6 5.6%                                    |
| S10 | 4.2207      | 293.75          | 0.02290                 | H-3 → L 67.3%, H → L+3 19.9%, H-2 → L+1 6.1%                                                                                  |
| S11 | 4.2210      | 293.73          | 0.02280                 | H-3 → L+1 67.3%, H-1 → L+3 19.9%, H-2 → L 6.0%                                                                                |
| S12 | 4.2743      | 290.07          | 0.26910                 | H-4 → L 13.9%, H-5 → L+1 13.4%, H-4 → L+1 13.4%, H-5 → L 13.0%, H-1 → L+3 10.5%, H-2 → L 8.8%, H → L+4 6.6%, H → L+2 5.2%     |
| S13 | 4.2744      | 290.06          | 0.26960                 | H-5 → L 13.7%, H-4 → L+1 13.5%, H-4 → L 13.4%, H-5 → L+1 12.9%, H → L+3 10.6%, H-2 → L+1 8.8%, H-1 → L+4 6.6%, H-1 → L+2 5.2% |
| S14 | 4.2912      | 288.93          | 0.00000                 | H-5 → L+1 20.1%, H-4 → L 19.1%, H-1 → L+5 12.7%, H → L+6 12.5%, H-1 → L+6 7.6%, H → L+5 7.4%                                  |
| S15 | 4.3445      | 285.38          | 0.10870                 | H → L+3 45.8%, H-3 → L 14.4%, H-1 → L+4 14.1%, H-5 → L+1 6.0%, H-4 → L 6.0%                                                   |
| S16 | 4.3446      | 285.38          | 0.10940                 | H-1 → L+3 45.8%, H-3 → L+1 14.4%, H → L+4 14.2%, H-4 → L+1 6.0%, H-5 → L 6.0%                                                 |
| S17 | 4.4367      | 279.45          | 0.00000                 | H-4 → L 21.0%, H-5 → L+1 21.0%, H → L+6 12.2%, H-1 → L+5 12.0%, H → L+5 7.3%, H-1 → L+6 7.0%                                  |
| S18 | 4.4818      | 276.64          | 0.04340                 | H → L+5 29.9%, H-1 → L+6 29.8%, H-6 → L 12.7%                                                                                 |
| S19 | 4.4818      | 276.64          | 0.04330                 | H-1 → L+5 30.0%, H → L+6 29.7%, H-6 → L+1 12.6%                                                                               |

|     |        |        |         |                                                                                                              |
|-----|--------|--------|---------|--------------------------------------------------------------------------------------------------------------|
| S20 | 4.5527 | 272.33 | 0.06320 | H-1 → L+6 24.4%, H → L+5 24.3%, H-1 → L+5 14.5%, H → L+6 14.3%, H-4 → L+1 7.7%, H-5 → L 7.6%                 |
| S21 | 4.5640 | 271.66 | 0.00620 | H → L+4 43.4%, H-6 → L 22.1%, H-1 → L+3 11.2%                                                                |
| S22 | 4.5642 | 271.64 | 0.00620 | H-1 → L+4 43.5%, H-6 → L+1 22.2%, H → L+3 11.2%                                                              |
| S23 | 4.6751 | 265.20 | 0.04200 | H-6 → L 20.5%, H-9 → L+1 14.5%, H → L+4 13.8%, H-6 → L+1 7.4%, H-9 → L 5.3%                                  |
| S24 | 4.6751 | 265.20 | 0.04140 | H-6 → L+1 20.0%, H-9 → L 14.8%, H-1 → L+4 13.7%, H-6 → L 7.5%, H-9 → L+1 5.3%                                |
| S25 | 4.7035 | 263.60 | 0.05250 | H-6 → L+1 21.8%, H-9 → L 15.3%, H-8 → L 10.5%, H-7 → L+1 10.3%, H → L+6 6.6%, H-1 → L+5 6.6%, H-6 → L 5.4%   |
| S26 | 4.7036 | 263.59 | 0.05170 | H-6 → L 21.3%, H-9 → L+1 15.8%, H-7 → L 10.6%, H-8 → L+1 10.3%, H → L+5 6.6%, H-1 → L+6 6.6%, H-6 → L+1 5.4% |
| S27 | 4.7624 | 260.34 | 0.00000 | H-8 → L+1 28.9%, H-7 → L 28.6%, H-7 → L+1 10.2%, H-8 → L 10.2%, H-1 → L+5 5.5%, H → L+6 5.5%                 |
| S28 | 4.8592 | 255.15 | 0.00390 | H-8 → L 34.3%, H-7 → L+1 34.3%, H-7 → L 12.3%, H-8 → L+1 12.1%                                               |
| S29 | 4.9031 | 252.87 | 0.00260 | H-9 → L 41.0%, H-8 → L+1 21.8%, H-7 → L 21.6%, H-9 → L+1 7.0%                                                |
| S30 | 4.9033 | 252.86 | 0.00260 | H-9 → L+1 41.0%, H-7 → L+1 21.7%, H-8 → L 21.5%, H-9 → L 7.1%                                                |
| S31 | 5.0098 | 247.48 | 0.00000 | H-2 → L+2 90.9%                                                                                              |
| S32 | 5.1477 | 240.85 | 0.00000 | H → L+7 44.4%, H-1 → L+8 41.3%                                                                               |
| S33 | 5.1647 | 240.06 | 0.13190 | H-1 → L+7 29.9%, H → L+8 28.0%, H-1 → L+8 8.2%, H → L+7 7.7%, H-5 → L+2 6.1%                                 |
| S34 | 5.1648 | 240.06 | 0.13170 | H-1 → L+8 30.2%, H → L+7 27.7%, H → L+8 8.0%, H-1 → L+7 7.9%, H-4 → L+2 6.1%                                 |
| S35 | 5.1684 | 239.89 | 0.01200 | H-3 → L+2 46.1%, H → L+8 20.4%, H-1 → L+7 18.5%, H-2 → L+3 9.8%                                              |
| S36 | 5.2370 | 236.75 | 0.05770 | H-3 → L+2 46.8%, H → L+8 19.8%, H-1 → L+7 19.7%                                                              |
| S37 | 5.3486 | 231.81 | 0.02040 | H-2 → L+3 71.6%, H-3 → L+4 9.9%                                                                              |
| S38 | 5.3922 | 229.93 | 0.06840 | H-4 → L+2 76.4%, H-1 → L+9 6.0%                                                                              |
| S39 | 5.3923 | 229.93 | 0.06850 | H-5 → L+2 76.4%, H → L+9 6.0%                                                                                |
| S40 | 5.4608 | 227.04 | 0.02860 | H-10 → L 26.0%, H-11 → L+1 25.6%, H → L+9 16.1%, H → L+10 8.7%, H-1 → L+11 8.6%                              |
| S41 | 5.4609 | 227.04 | 0.02830 | H-11 → L 26.0%, H-10 → L+1 25.9%, H-1 → L+9 15.8%, H → L+11 8.7%, H-1 → L+10 8.7%                            |
| S42 | 5.4952 | 225.62 | 0.03620 | H → L+9 55.0%, H-10 → L 7.7%, H-11 → L+1 7.5%, H-2 → L+5 6.3%                                                |
| S43 | 5.4953 | 225.62 | 0.03640 | H-1 → L+9 55.3%, H-11 → L 7.5%, H-10 → L+1 7.5%, H-2 → L+6 6.3%                                              |
| S44 | 5.5079 | 225.10 | 0.00000 | H-2 → L+4 67.1%, H-3 → L+3 24.1%                                                                             |

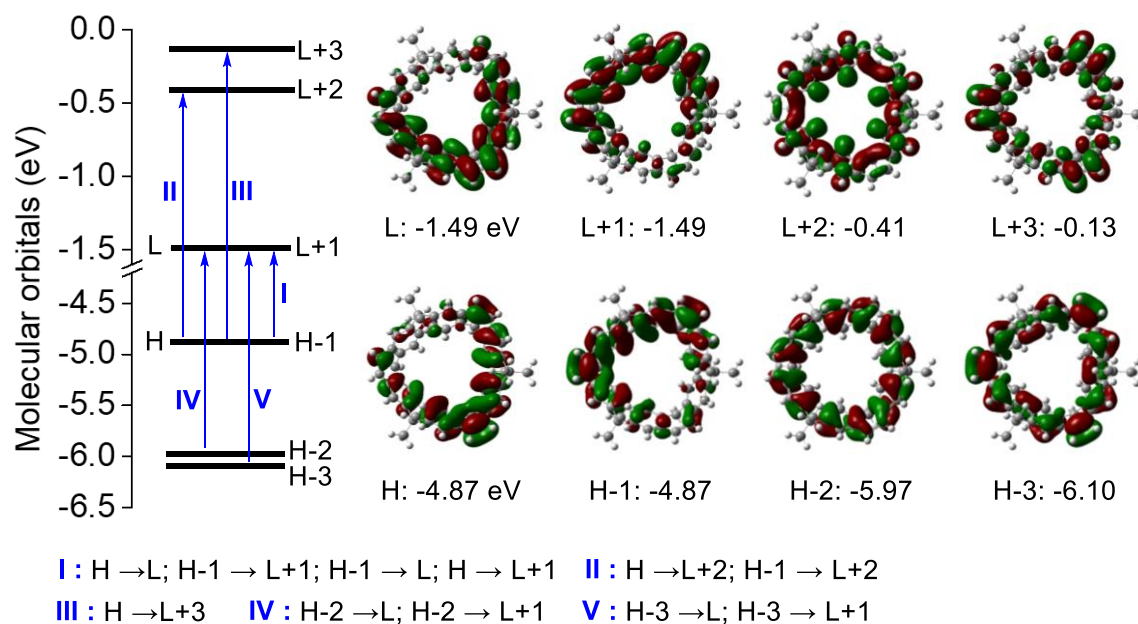

**Fig. S39** Calculated frontier molecular orbital profiles, energy diagram, and major electronic transitions of **3**.

**Table S4.** Major Electronic Transitions for (*P*)-**4** by TD-DFT Method Using B3LYP/6-31G(d).

|     | energy (eV) | Excitation [nm] | Oscillator strength (f) | Description                                                                  |
|-----|-------------|-----------------|-------------------------|------------------------------------------------------------------------------|
| S1  | 2.5202      | 491.96          | 0.18330                 | H → L 97.5%                                                                  |
| S2  | 2.5885      | 478.98          | 0.11600                 | H-1 → L 76.9%, H → L+1 21.9%                                                 |
| S3  | 3.0286      | 409.38          | 0.92150                 | H → L+1 74.0%, H-1 → L 20.9%                                                 |
| S4  | 3.1591      | 392.47          | 0.02810                 | H-3 → L 48.2%, H-6 → L 17.5%, H-2 → L 14.3%                                  |
| S5  | 3.2297      | 383.89          | 0.52070                 | H-1 → L+1 95.9%                                                              |
| S6  | 3.5259      | 351.64          | 0.19440                 | H-2 → L 72.8%, H-6 → L 9.4%                                                  |
| S7  | 3.7293      | 332.46          | 0.09010                 | H-6 → L 29.6%, H → L+2 21.5%, H-3 → L 19.3%, H-4 → L 11.9%, H-7 → L 5.6%     |
| S8  | 3.7528      | 330.38          | 0.38970                 | H → L+2 71.6%, H-6 → L 7.2%, H-4 → L 7.0%                                    |
| S9  | 3.8167      | 324.85          | 0.13200                 | H-4 → L 44.2%, H-5 → L 18.2%, H-3 → L 13.9%, H-1 → L+2 8.6%, H-2 → L+1 6.8%  |
| S10 | 3.8698      | 320.39          | 0.00560                 | H-1 → L+2 31.5%, H-5 → L 29.4%, H → L+3 18.9%, H-4 → L 5.3%                  |
| S11 | 3.9182      | 316.43          | 0.09390                 | H-5 → L 37.3%, H-1 → L+2 14.5%, H-2 → L+1 14.1%, H → L+3 11.4%, H-6 → L 6.6% |
| S12 | 3.9766      | 311.78          | 0.00690                 | H-1 → L+2 32.3%, H → L+3 30.4%, H-4 → L 11.2%                                |

|     |        |        |         |                                                                                             |
|-----|--------|--------|---------|---------------------------------------------------------------------------------------------|
| S13 | 4.0251 | 308.03 | 0.01200 | H-2 → L+1 43.1%, H → L+3 17.0%, H-7 → L 12.1%, H-1 → L+3 7.5%                               |
| S14 | 4.0736 | 304.36 | 0.10540 | H-7 → L 27.4%, H-1 → L+3 17.8%, H-2 → L+1 10.8%, H → L+3 10.7%, H-6 → L 7.9%                |
| S15 | 4.1539 | 298.48 | 0.07690 | H-3 → L+1 63.1%, H-1 → L+3 7.0%, H-2 → L+1 6.6%                                             |
| S16 | 4.1838 | 296.34 | 0.08730 | H-1 → L+3 20.2%, H-7 → L 18.7%, H-10 → L 14.5%, H-5 → L+1 14.1%, H-9 → L 6.8%, H-6 → L 5.3% |
| S17 | 4.2282 | 293.23 | 0.02990 | H-5 → L+1 40.6%, H-10 → L 12.7%, H-9 → L 10.4%, H → L+6 7.4%, H-3 → L+1 6.2%, H → L+4 5.0%  |
| S18 | 4.2915 | 288.91 | 0.06540 | H-1 → L+3 25.4%, H-10 → L 18.1%, H-7 → L 10.8%, H-9 → L 9.8%, H-3 → L+1 8.3%, H → L+5 5.6%  |
| S19 | 4.3262 | 286.59 | 0.04470 | H-4 → L+1 28.8%, H-10 → L 18.5%, H-8 → L 8.9%, H → L+4 7.7%, H → L+5 7.2%, H-1 → L+3 7.1%   |
| S20 | 4.3819 | 282.95 | 0.05750 | H-4 → L+1 29.6%, H-8 → L 25.6%, H-9 → L 24.0%, H-10 → L 6.1%                                |
| S21 | 4.4192 | 280.56 | 0.01670 | H-8 → L 53.3%, H → L+4 16.1%, H-10 → L 11.5%, H-9 → L 5.9%, H-4 → L+1 5.1%                  |
| S22 | 4.4411 | 279.17 | 0.03340 | H → L+5 25.4%, H-9 → L 23.6%, H-4 → L+1 16.9%, H → L+6 7.7%, H-6 → L+1 5.2%                 |
| S23 | 4.4694 | 277.41 | 0.06200 | H → L+4 43.1%, H-5 → L+1 9.0%, H → L+6 6.8%, H → L+5 6.7%, H-7 → L+1 5.9%, H-8 → L 5.7%     |
| S24 | 4.5067 | 275.11 | 0.02640 | H-6 → L+1 69.7%, H-8 → L+1 6.6%                                                             |
| S25 | 4.5376 | 273.24 | 0.09450 | H → L+6 33.2%, H-1 → L+4 16.1%, H → L+5 16.0%, H-5 → L+1 9.2%, H-2 → L+2 5.6%               |
| S26 | 4.6080 | 269.06 | 0.05420 | H-1 → L+4 53.9%, H → L+5 10.4%, H-9 → L 5.3%                                                |
| S27 | 4.6342 | 267.54 | 0.13170 | H-7 → L+1 48.7%, H-1 → L+6 12.7%, H-1 → L+5 11.3%, H-6 → L+1 5.3%                           |
| S28 | 4.6859 | 264.59 | 0.00430 | H-1 → L+5 25.8%, H → L+6 20.5%, H-8 → L+1 18.2%, H-2 → L+2 16.1%                            |
| S29 | 4.7046 | 263.54 | 0.01650 | H-3 → L+2 29.4%, H-2 → L+2 20.7%, H-8 → L+1 20.6%, H-1 → L+4 5.1%                           |
| S30 | 4.7137 | 263.03 | 0.03170 | H-1 → L+5 34.4%, H-7 → L+1 23.7%, H-8 → L+1 10.5%                                           |
| S31 | 4.7732 | 259.75 | 0.00820 | H-1 → L+6 52.0%, H-8 → L+1 14.4%, H-7 → L+1 8.9%, H-3 → L+2 7.8%                            |
| S32 | 4.7987 | 258.37 | 0.03300 | H-2 → L+2 36.4%, H-3 → L+2 20.5%, H-9 → L+1 17.7%                                           |
| S33 | 4.8632 | 254.94 | 0.01670 | H-9 → L+1 42.9%, H → L+7 12.9%, H-10 → L+1 8.7%, H-2 → L+2 7.4%, H-1 → L+5 7.1%             |
| S34 | 4.9377 | 251.10 | 0.01790 | H → L+7 49.2%, H-10 → L+1 14.1%, H-9 → L+1 11.8%                                            |
| S35 | 4.9619 | 249.87 | 0.00480 | H-10 → L+1 26.3%, H-2 → L+3 21.1%, H-4 → L+2 12.6%, H → L+7 11.6%, H-5 → L+2 7.0%           |

|     |        |        |         |                                                                                               |
|-----|--------|--------|---------|-----------------------------------------------------------------------------------------------|
| S36 | 5.0018 | 247.88 | 0.00050 | H-2 → L+3 38.3%, H-10 → L+1 17.0%, H → L+7 8.5%, H-4 → L+2 7.1%, H-11 → L 6.4%                |
| S37 | 5.0315 | 246.42 | 0.01100 | H-5 → L+2 32.7%, H-10 → L+1 15.5%, H → L+8 12.6%, H-6 → L+2 9.9%, H-2 → L+3 7.1%              |
| S38 | 5.0541 | 245.31 | 0.00550 | H-11 → L 45.1%, H-4 → L+2 19.5%, H-2 → L+3 11.6%, H-12 → L 5.9%                               |
| S39 | 5.0681 | 244.64 | 0.02530 | H-1 → L+7 54.3%, H-4 → L+2 12.9%, H-11 → L 10.3%, H-6 → L+2 7.9%                              |
| S40 | 5.1027 | 242.98 | 0.00480 | H-6 → L+2 31.0%, H → L+8 26.4%, H-3 → L+2 7.8%, H-11 → L 6.1%                                 |
| S41 | 5.1069 | 242.78 | 0.01900 | H-4 → L+2 27.6%, H-12 → L 27.3%, H-11 → L 10.0%, H-1 → L+7 6.9%, H-2 → L+3 5.6%, H → L+8 5.1% |
| S42 | 5.1529 | 240.61 | 0.01930 | H-5 → L+2 31.5%, H → L+8 30.9%, H-6 → L+2 10.9%, H-1 → L+7 6.9%                               |
| S43 | 5.1805 | 239.33 | 0.08200 | H-3 → L+3 50.5%, H → L+9 10.5%, H-12 → L 5.3%                                                 |
| S44 | 5.2061 | 238.15 | 0.05010 | H-12 → L 31.7%, H → L+9 25.6%, H-1 → L+8 6.0%, H → L+8 5.7%, H-11 → L 5.0%                    |
| S45 | 5.2466 | 236.31 | 0.04030 | H-3 → L+3 28.4%, H → L+9 16.4%, H-12 → L 13.1%, H-1 → L+7 8.6%                                |

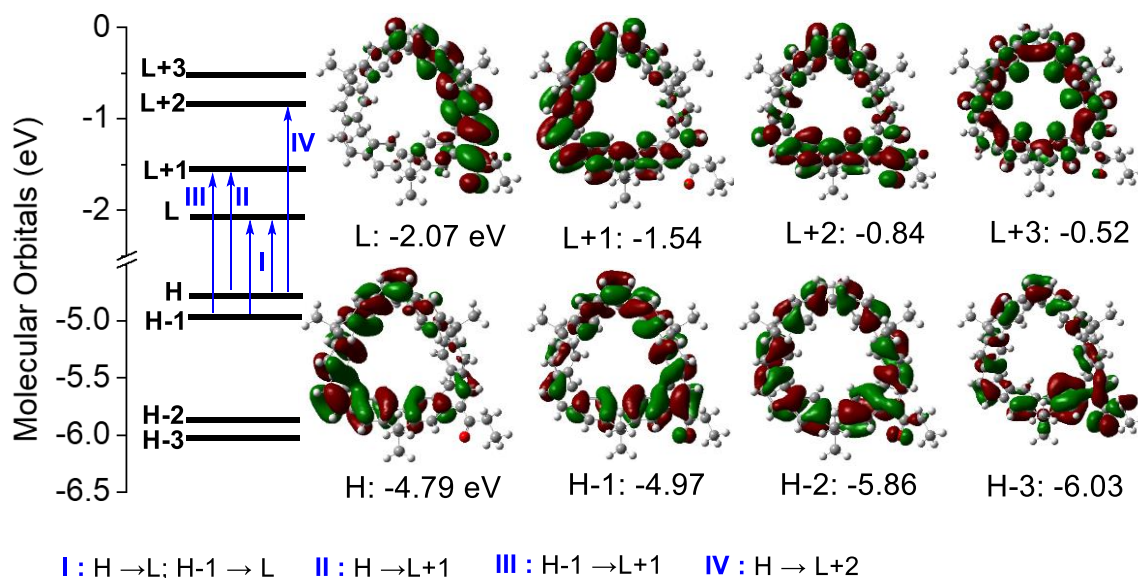

**Fig. S40** Calculated frontier molecular orbital profiles, energy diagram, and major electronic transitions of (P)-4.



Excitation energies and oscillator strengths:

Excited State 1: Singlet-A 2.9927 eV 414.28 nm f=0.6517  
<S\*\*2>=0.000  
182 -> 184 -0.42105  
182 -> 185 -0.25976  
183 -> 184 -0.25937  
183 -> 185 0.42102  
This state for optimization and/or second-order correction.  
Total Energy, E(TD-HF/TD-DFT) = -2083.05937231  
Copying the excited state density for this state as the 1-particle RhoCl density.

Excited State 2: Singlet-A 2.7148 eV 456.71 nm f=0.0008  
<S\*\*2>=0.000  
182 -> 184 -0.49580  
183 -> 185 -0.49587

Excited State 3: Singlet-A 2.5275 eV 490.54 nm f=0.0000  
<S\*\*2>=0.000  
182 -> 185 0.49585  
183 -> 184 -0.49661

**Fig. S41** Excitation energies and oscillator strengths for 3.

Excitation energies and oscillator strengths:

Excited State 1: Singlet-A 2.5363 eV 488.84 nm f=0.1068  
<S\*\*2>=0.000  
197 -> 200 -0.11214  
198 -> 199 0.69078  
This state for optimization and/or second-order correction.  
Total Energy, E(TD-HF/TD-DFT) = -2274.77144170  
Copying the excited state density for this state as the 1-particle RhoCl density.

Excited State 2: Singlet-A 2.6015 eV 476.58 nm f=0.0690  
<S\*\*2>=0.000  
197 -> 199 0.59042  
198 -> 200 0.37212

Excited State 3: Singlet-A 3.0378 eV 408.13 nm f=0.0816  
<S\*\*2>=0.000  
192 -> 199 0.16686  
193 -> 199 0.14109  
194 -> 199 0.14706  
195 -> 199 0.40337  
195 -> 201 -0.10015  
196 -> 199 0.38967  
197 -> 199 0.10873  
198 -> 200 -0.23286

**Fig. S42** Excitation energies and oscillator strengths for 4.

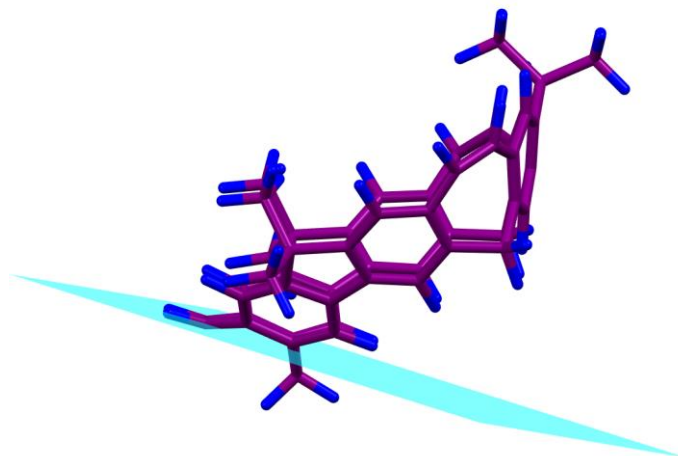

**Fig. S43** Illumination of the shielding effect from the vinyl plane to  $\text{CH}_{2(o)}$  for **3**.

## 10. Cartesian coordinates of the optimized structures

**3**

|          |         |         |         |          |         |         |         |
|----------|---------|---------|---------|----------|---------|---------|---------|
| <b>C</b> | 3.9736  | -1.558  | 1.8681  | <b>C</b> | 3.0802  | 2.9800  | 0.4095  |
| <b>C</b> | 1.1386  | -3.9825 | 0.0006  | <b>C</b> | 2.1363  | 3.4186  | 1.2467  |
| <b>C</b> | -0.0633 | -4.7008 | -0.5918 | <b>C</b> | 1.4188  | 4.5015  | 0.9039  |
| <b>C</b> | -1.1094 | -3.9457 | 0.2126  | <b>C</b> | 1.6355  | 5.1444  | -0.2607 |
| <b>C</b> | -0.548  | -3.1494 | 1.1319  | <b>C</b> | 2.7089  | 4.7848  | -1.0011 |
| <b>C</b> | 0.785   | -3.1713 | 1.0063  | <b>C</b> | 5.0906  | 0.5356  | -0.966  |
| <b>C</b> | 1.6995  | -2.4393 | 1.6484  | <b>C</b> | 4.8312  | -0.5584 | -0.2141 |
| <b>C</b> | 2.9596  | -2.423  | 1.1828  | <b>C</b> | 4.1614  | -0.3933 | 0.9438  |
| <b>C</b> | 3.3102  | -3.1272 | 0.0884  | <b>C</b> | 3.6102  | 0.7881  | 1.2682  |
| <b>C</b> | 2.4100  | -3.9919 | -0.4328 | <b>C</b> | -3.4651 | -1.4358 | 2.5692  |
| <b>C</b> | -2.4391 | -3.9123 | 0.0242  | <b>C</b> | -4.3595 | 1.8558  | 0.1676  |
| <b>C</b> | -3.1974 | -3.0203 | 0.7017  | <b>C</b> | -4.4522 | 3.1329  | -0.6521 |
| <b>C</b> | -2.6258 | -2.3313 | 1.7092  | <b>C</b> | -3.2154 | 3.7894  | -0.0598 |
| <b>C</b> | -1.3021 | -2.3900 | 1.9313  | <b>C</b> | -2.7148 | 3.0762  | 0.9575  |
| <b>C</b> | 0.3218  | 4.9615  | 1.8155  | <b>C</b> | -3.3933 | 1.9296  | 1.0925  |
| <b>C</b> | 3.404   | 3.6792  | -0.6863 | <b>C</b> | -3.1448 | 0.8994  | 1.9057  |
| <b>C</b> | 4.486   | 2.9845  | -1.4975 | <b>C</b> | -3.7846 | -0.2627 | 1.6931  |
| <b>C</b> | 4.5081  | 1.7094  | -0.6699 | <b>C</b> | -4.664  | -0.4022 | 0.6813  |
| <b>C</b> | 3.7349  | 1.8118  | 0.4191  | <b>C</b> | -5.0242 | 0.7023  | -0.0115 |

|   |         |         |         |   |         |         |         |
|---|---------|---------|---------|---|---------|---------|---------|
| C | -2.5562 | 4.873   | -0.5023 | C | -5.724  | 3.9233  | -0.3269 |
| C | -1.3516 | 5.1946  | 0.0224  | H | -2.3613 | 0.9613  | 2.6761  |
| C | -0.9414 | 4.541   | 1.1275  | H | -5.7458 | 0.6508  | -0.8429 |
| C | -1.6168 | 3.481   | 1.6017  | H | -2.9474 | 5.3796  | -1.3994 |
| C | -0.5716 | 6.0882  | -0.627  | H | -1.2105 | 2.905   | 2.447   |
| C | 0.7774  | 6.0653  | -0.755  | H | -1.0685 | 6.7121  | -1.3962 |
| C | -5.1266 | -1.6076 | 0.2793  | H | 1.1414  | 6.6747  | -1.6059 |
| C | -4.4642 | -2.7901 | 0.2886  | H | -5.9881 | -1.6001 | -0.4174 |
| C | 4.4845  | -2.9373 | -0.5547 | H | -4.9032 | -3.537  | -0.4023 |
| C | 5.1716  | -1.777  | -0.6913 | H | 4.7621  | -3.696  | -1.313  |
| H | 4.9306  | -2.1062 | 2.0255  | H | 5.8877  | -1.7954 | -1.5366 |
| H | 3.6497  | -1.2463 | 2.8861  | H | 6.6315  | 3.1525  | -1.9147 |
| C | -0.2015 | -4.4486 | -2.0992 | H | 6.1268  | 3.9137  | -0.3645 |
| C | -0.0552 | -6.1945 | -0.2501 | H | 5.7508  | 4.7227  | -1.927  |
| H | 1.4149  | -1.7823 | 2.4842  | H | -0.9986 | -6.6834 | -0.5834 |
| H | 2.6438  | -4.6007 | -1.3212 | H | 0.045   | -6.3618 | 0.8466  |
| H | -2.8543 | -4.5104 | -0.8031 | H | 0.7937  | -6.7121 | -0.7516 |
| H | -0.8452 | -1.7451 | 2.6972  | H | -5.7199 | 4.9114  | -0.8405 |
| H | 0.3541  | 6.0657  | 1.9595  | H | -5.8204 | 4.1094  | 0.7671  |
| H | 0.4117  | 4.5351  | 2.8395  | H | -6.6315 | 3.3696  | -0.6584 |
| C | 4.0461  | 2.7257  | -2.9447 | H | -1.1445 | -4.8846 | -2.4985 |
| C | 5.8205  | 3.7336  | -1.4201 | H | 0.636   | -4.9129 | -2.6665 |
| H | 1.8775  | 2.8541  | 2.1553  | H | -0.2058 | -3.3586 | -2.3288 |
| H | 2.9414  | 5.2809  | -1.9573 | H | 4.7992  | 2.1181  | -3.4949 |
| H | 5.6418  | 0.463   | -1.9176 | H | 3.9237  | 3.6778  | -3.5079 |
| H | 2.9869  | 0.8732  | 2.1712  | H | 3.0754  | 2.1804  | -2.9818 |
| H | -2.9468 | -1.1382 | 3.5079  | H | -4.2563 | 3.8167  | -2.7335 |
| H | -4.3932 | -1.953  | 2.9044  | H | -5.1618 | 2.2847  | -2.5536 |
| C | -4.3003 | 2.8664  | -2.1557 | H | -3.3712 | 2.2917  | -2.3735 |

**P-4**

|   |         |         |         |   |         |         |         |
|---|---------|---------|---------|---|---------|---------|---------|
| C | 2.0311  | 0.8111  | -3.7459 | C | -2.2741 | -3.0761 | -3.0551 |
| C | -0.0762 | -2.7639 | -3.4836 | C | -2.0238 | -1.7746 | -3.2492 |
| C | -1.0339 | -3.9271 | -3.2767 | C | -0.7204 | -1.5921 | -3.4946 |

|   |         |         |         |   |         |         |         |
|---|---------|---------|---------|---|---------|---------|---------|
| C | -0.0346 | -0.4555 | -3.6251 | C | -3.2148 | 3.0691  | 1.2618  |
| C | 1.3091  | -0.4977 | -3.6353 | C | -1.5114 | 3.6705  | 4.3571  |
| C | 2.0068  | -1.6518 | -3.5405 | C | -0.1874 | 3.8324  | 4.1173  |
| C | 1.2657  | -2.7885 | -3.5336 | C | 3.9372  | -0.7934 | -2.4629 |
| C | -3.4784 | -3.4634 | -2.6031 | C | 3.3548  | -1.6716 | -3.3284 |
| C | -4.4099 | -2.5392 | -2.2751 | C | -6.1244 | -2.2207 | -0.584  |
| C | -4.1782 | -1.2543 | -2.6098 | C | -5.4888 | -2.9213 | -1.5547 |
| C | -2.9869 | -0.8626 | -3.0917 | C | -4.6254 | -0.4213 | 4.0122  |
| C | -1.4172 | 4.6697  | 1.7059  | C | -6.5354 | 1.2498  | 3.7963  |
| C | 2.2463  | 2.6804  | 1.8053  | C | 3.5131  | 0.6058  | 2.519   |
| C | 3.5098  | 1.855   | 1.6278  | C | 4.7722  | 2.7041  | 1.8107  |
| C | 3.2687  | 1.5132  | 0.1667  | C | -0.6787 | -4.7562 | -2.035  |
| C | 2.2051  | 2.1604  | -0.3277 | C | -1.1554 | -4.7902 | -4.5371 |
| C | 1.5978  | 2.8516  | 0.6456  | H | 4.9199  | -1.0805 | -2.0583 |
| C | 0.4541  | 3.5403  | 0.5994  | H | -5.6897 | -4.0098 | -1.5047 |
| C | -0.1063 | 3.9447  | 1.7518  | H | -1.7406 | 3.5066  | 5.4287  |
| C | 0.4621  | 3.6686  | 2.9425  | C | 5.5433  | -2.9898 | -3.2879 |
| C | 1.7     | 3.1242  | 2.9493  | O | 3.6689  | -3.5809 | -4.526  |
| C | 3.9105  | 0.6078  | -0.5895 | H | 2.9019  | 0.75    | -4.4375 |
| C | 3.4414  | 0.2879  | -1.8178 | H | 1.3947  | 1.6301  | -4.1486 |
| C | 2.4589  | 1.0505  | -2.3329 | H | -0.5577 | 0.513   | -3.6381 |
| C | 1.831   | 1.9838  | -1.5981 | H | 1.7009  | -3.7868 | -3.379  |
| C | -5.2484 | -0.2269 | -2.3989 | H | -3.6172 | -4.5306 | -2.3656 |
| C | -5.3852 | 0.3697  | 1.7268  | H | -2.7895 | 0.2053  | -3.2711 |
| C | -5.2248 | 0.731   | 3.1951  | H | -1.6504 | 5.066   | 0.6925  |
| C | -4.226  | 1.8555  | 2.9712  | H | -1.4088 | 5.5633  | 2.371   |
| C | -4.0641 | 2.122   | 1.6685  | H | -0.0742 | 3.696   | -0.3535 |
| C | -4.7513 | 1.2409  | 0.931   | H | 2.2192  | 2.8851  | 3.8915  |
| C | -4.7593 | 1.0891  | -0.3958 | H | 4.7284  | 0.0395  | -0.1175 |
| C | -5.2943 | -0.0281 | -0.9149 | H | 0.9706  | 2.5269  | -2.0176 |
| C | -5.8182 | -0.9862 | -0.1248 | H | -6.2301 | -0.5819 | -2.7881 |
| C | -5.9558 | -0.7242 | 1.1952  | H | -5.0455 | 0.7182  | -2.9503 |
| C | -3.4548 | 2.4777  | 3.8783  | H | -4.25   | 1.81    | -1.0532 |
| C | -2.4647 | 3.3043  | 3.4708  | H | -6.3853 | -1.4661 | 1.8878  |
| C | -2.4176 | 3.655   | 2.1703  | H | -3.5472 | 2.1643  | 4.9307  |

|   |         |         |         |
|---|---------|---------|---------|
| H | -3.0885 | 3.2985  | 0.1929  |
| H | 0.4287  | 3.7728  | 5.0363  |
| C | 4.0881  | -2.7656 | -3.7286 |
| H | -6.7297 | -2.8622 | 0.0867  |
| H | -3.674  | -0.7855 | 3.5614  |
| H | -4.4087 | -0.1071 | 5.0577  |
| H | -5.3264 | -1.2837 | 4.0719  |
| H | -6.9588 | 2.0851  | 3.1933  |
| H | -7.2998 | 0.4412  | 3.8402  |
| H | -6.3755 | 1.6259  | 4.8322  |
| H | 3.5758  | 0.8768  | 3.5967  |
| H | 2.5888  | 0.0013  | 2.3729  |
| H | 4.3861  | -0.0481 | 2.2973  |
| H | 4.7554  | 3.6062  | 1.1576  |

|   |         |         |         |
|---|---------|---------|---------|
| H | 4.8692  | 3.0497  | 2.8649  |
| H | 5.6851  | 2.1186  | 1.5579  |
| H | -1.4528 | -5.529  | -1.8289 |
| H | 0.2872  | -5.2932 | -2.1669 |
| H | -0.5902 | -4.1127 | -1.1301 |
| H | -1.4153 | -4.1753 | -5.4287 |
| H | -0.197  | -5.3144 | -4.7536 |
| H | -1.9475 | -5.5633 | -4.4148 |
| C | 6.2527  | -4.1982 | -3.9236 |
| H | 5.5611  | -3.1534 | -2.1828 |
| H | 6.1493  | -2.0898 | -3.5547 |
| H | 7.2998  | -4.285  | -3.5509 |
| H | 6.3056  | -4.1044 | -5.0327 |
| H | 5.7361  | -5.1538 | -3.6753 |

**M-4**

|   |         |         |         |
|---|---------|---------|---------|
| C | 2.9501  | 0.6906  | -5.3967 |
| C | 0.7682  | -2.8608 | -5.2069 |
| C | -0.2168 | -4.0076 | -5.0432 |
| C | -1.4477 | -3.1329 | -4.8653 |
| C | -1.1697 | -1.8393 | -5.0735 |
| C | 0.1438  | -1.6778 | -5.2764 |
| C | 0.8361  | -0.5428 | -5.4042 |
| C | 2.1758  | -0.5903 | -5.3205 |
| C | 2.8223  | -1.7547 | -5.1137 |
| C | 2.1103  | -2.9036 | -5.1681 |
| C | -2.6685 | -3.4905 | -4.4334 |
| C | -3.5842 | -2.5423 | -4.1299 |
| C | -3.3205 | -1.2662 | -4.4742 |
| C | -2.1164 | -0.9058 | -4.948  |
| C | -0.5741 | 4.7135  | -0.1146 |
| C | 3.0407  | 2.6616  | 0.1158  |
| C | 4.3065  | 1.8293  | -0.0055 |

|   |         |         |         |
|---|---------|---------|---------|
| C | 4.1135  | 1.4652  | -1.4681 |
| C | 3.0705  | 2.1106  | -2.0072 |
| C | 2.4345  | 2.8226  | -1.0678 |
| C | 1.3017  | 3.5248  | -1.1622 |
| C | 0.7122  | 3.9548  | -0.034  |
| C | 1.227   | 3.6851  | 1.1802  |
| C | 2.4581  | 3.1259  | 1.2331  |
| C | 4.7713  | 0.5398  | -2.1856 |
| C | 4.3314  | 0.2003  | -3.4185 |
| C | 3.3669  | 0.9549  | -3.9816 |
| C | 2.7316  | 1.9116  | -3.2839 |
| C | -4.3625 | -0.2085 | -4.2749 |
| C | -4.5332 | 0.4187  | -0.1552 |
| C | -4.3989 | 0.7897  | 1.313   |
| C | -3.4001 | 1.917   | 1.1021  |
| C | -3.1862 | 2.1488  | -0.1973 |
| C | -3.8619 | 1.2673  | -0.9449 |

|   |         |         |         |   |         |         |         |
|---|---------|---------|---------|---|---------|---------|---------|
| C | -3.8489 | 1.1022  | -2.2703 | H | -1.8941 | 0.1566  | -5.1301 |
| C | -4.4101 | -0.0018 | -2.7915 | H | -0.7894 | 5.0888  | -1.1397 |
| C | -4.9709 | -0.9406 | -2.0037 | H | -0.5602 | 5.6206  | 0.5314  |
| C | -5.1201 | -0.6658 | -0.6878 | H | 0.8088  | 3.6798  | -2.1339 |
| C | -2.677  | 2.5725  | 2.0249  | H | 2.9491  | 2.8997  | 2.1936  |
| C | -1.6871 | 3.4362  | 1.6849  | H | 5.5642  | -0.0335 | -1.6784 |
| C | -1.5691 | 3.7003  | 0.3643  | H | 1.8844  | 2.4503  | -3.7349 |
| C | -2.3085 | 3.0806  | -0.5722 | H | -5.3514 | -0.5379 | -4.6684 |
| C | -0.7885 | 3.8965  | 2.6035  | H | -4.1309 | 0.7291  | -4.8279 |
| C | 0.5467  | 3.9149  | 2.3272  | H | -3.315  | 1.8093  | -2.9233 |
| C | 4.809   | -0.9252 | -3.9964 | H | -5.5818 | -1.3897 | 0.0031  |
| C | 4.1275  | -1.8095 | -4.7647 | H | -2.8298 | 2.2091  | 3.0516  |
| C | -5.3067 | -2.1688 | -2.4594 | H | -2.1298 | 3.2805  | -1.6398 |
| C | -4.6796 | -2.8924 | -3.4185 | H | 1.2276  | 3.9433  | 3.1916  |
| C | -3.811  | -0.3592 | 2.1435  | H | 4.6136  | -2.8039 | -4.8152 |
| C | -5.7207 | 1.3075  | 1.8901  | H | -5.9367 | -2.7893 | -1.7916 |
| C | 4.2759  | 0.5955  | 0.9064  | H | -2.8491 | -0.7195 | 1.7124  |
| C | 5.5648  | 2.678   | 0.2056  | H | -3.6173 | -0.0448 | 3.1934  |
| C | 0.0789  | -4.8486 | -3.794  | H | -4.5093 | -1.2247 | 2.1889  |
| C | -0.3073 | -4.8624 | -6.3117 | H | -6.1359 | 2.1388  | 1.276   |
| H | 5.7309  | -1.3551 | -3.557  | H | -6.4837 | 0.4972  | 1.9255  |
| H | -4.9079 | -3.9752 | -3.362  | H | -5.5793 | 1.6891  | 2.9267  |
| C | -0.7831 | 4.5133  | 6.4461  | H | 4.3036  | 0.8847  | 1.9809  |
| C | -0.1711 | 4.2771  | 5.0543  | H | 3.3552  | -0.0089 | 0.7397  |
| O | -2.3432 | 4.0878  | 4.2543  | H | 5.1539  | -0.0643 | 0.7254  |
| H | 0.4452  | 5.1789  | 4.8194  | H | 5.5727  | 3.5693  | -0.4624 |
| C | -1.1771 | 4.0444  | 3.9159  | H | 5.628   | 3.0407  | 1.2566  |
| H | 0.4824  | 3.3752  | 5.1441  | H | 6.4837  | 2.086   | -0.0073 |
| H | 0.0145  | 4.6684  | 7.2094  | H | -0.7127 | -5.6121 | -3.6225 |
| H | -1.3907 | 3.6406  | 6.7796  | H | 1.0423  | -5.3972 | -3.8931 |
| H | 3.8342  | 0.5897  | -6.0669 | H | 0.1414  | -4.2117 | -2.8822 |
| H | 2.3537  | 1.5251  | -5.8285 | H | -0.5223 | -4.239  | -7.2094 |
| H | 0.3254  | 0.4296  | -5.4734 | H | 0.6485  | -5.4037 | -6.4948 |
| H | 2.5874  | -3.885  | -5.0143 | H | -1.1181 | -5.6206 | -6.2225 |
| H | -2.8331 | -4.5511 | -4.1832 | H | -1.4315 | 5.4194  | 6.4598  |

## 11. References

- S1. Gaussian 09, Revision A.02, M. J. Frisch, G. W. Trucks, H. B. Schlegel, G. E. Scuseria, M. A. Robb, J. R. Cheeseman, G. Scalmani, V. Barone, B. Mennucci, G. A. Petersson, H. Nakatsuji, M. Caricato, X. Li, H. P. Hratchian, A. F. Izmaylov, J. Bloino, G. Zheng, J. L. Sonnenberg, M. Hada, M. Ehara, K. Toyota, R. Fukuda, J. Hasegawa, M. Ishida, T. Nakajima, Y. Honda, O. Kitao, H. Nakai, T. Vreven, J. A. Montgomery, Jr., J. E. Peralta, F. Ogliaro, M. Bearpark, J. J. Heyd, E. Brothers, K. N. Kudin, V. N. Staroverov, R. Kobayashi, J. Normand, K. Raghavachari, A. Rendell, J. C. Burant, S. S. Iyengar, J. Tomasi, M. Cossi, N. Rega, J. M. Millam, M. Klene, J. E. Knox, J. B. Cross, V. Bakken, C. Adamo, J. Jaramillo, R. Gomperts, R. E. Stratmann, O. Yazyev, A. J. Austin, R. Cammi, C. Pomelli, J. W. Ochterski, R. L. Martin, K. Morokuma, V. G. Zakrzewski, G. A. Voth, P. Salvador, J. J. Dannenberg, S. Dapprich, A. D. Daniels, O. Farkas, J. B. Foresman, J. V. Ortiz, J. Cioslowski, and D. J. Fox, Gaussian, Inc., Wallingford CT, 2009.
- S2. T. Lu and F. Chen, *J. Comput. Chem.*, 2012, **33**, 580-592.
